# Supplementary material
Source: publisher site journal article supplement (https://www.dovepress.com/article/456093)
Supplement: Supplementary file 1 [file get_supplementary_file.php]

***Supplementary Material***

**Limited Generalizability of Retrospective Single-Center Cohort Study in Comparison to Multicenter Cohort Study on Prognosis of Hepatocellular Carcinoma**

Kim et al.

**SUPPLEMENTARY TABLE 1.** Baseline characteristics of the study populationsa

| Variable | Single-center cohort  (n=15,655) | Multicenter cohort (n=16,443) | *P*-value |
| --- | --- | --- | --- |
| Age (years) | 57.7 ± 10.4 | 61.1 ± 11.5 | <0.001 |
| Male | 12,690 (81.1%) | 13,045 (79.3%) | <0.001 |
| Body mass index (kg/㎡) | 24.3 ± 3.3 | 24.0 ± 3.4 | <0.001 |
| Diabetes mellitus | 3,314 (21.2%) | 5,779 (35.1%) | <0.001 |
| Unknown | 615 (3.9%) | 2,002 (12.2%) |  |
| Hypertension | 4,564 (29.2%) | 4,347 (26.4%) | <0.001 |
| Unknown | 541 (3.5%) | 3,434 (20.9%) |  |
| Hepatitis Bb | 10,622 (67.8%) | 9,879 (60.1%) | <0.001 |
| Unknown | 1,125 (7.2%) | 592 (3.6%) |  |
| Hepatitis Cc | 1,410 (9.0%) | 1,883 (11.5%) | <0.001 |
| Unknown | 2,126 (13.6%) | 1,622 (9.9%) |  |
| mUICC staging |  |  |  |
| Stage I | 2,626 (16.8%) | 2,532 (15.4%) | <0.001 |
| Stage II | 6,176 (39.5%) | 6,168 (37.5%) |  |
| Stage III | 4,712 (30.1%) | 4,147 (25.2%) |  |
| Stage IVA | 1,291 (8.2%) | 1,920 (11.7%) |  |
| Stage IVB | 850 (5.4%) | 1,627 (9.9%) |  |
| Unknown | 0 (0.0%) | 49 (0.3%) |  |
| BCLC staging |  |  |  |
| Stage 0 | 2,572 (16.4%) | 1,312 (9.0%) | <0.001 |
| Stage A | 6,719 (42.9%) | 3,655 (22.2%) |  |
| Stage B | 2,293 (14.6%) | 2,722 (16.6%) |  |
| Stage C | 3,563 (22.8%) | 5,402 (32.9%) |  |
| Stage D | 508 (3.2%) | 1,013 (6.2%) |  |
| Unknown | 0 (0.0%) | 2,339 (14.2%) |  |
| Child-Pugh class |  |  | <0.001 |
| Class A | 12,126 (77.5%) | 11,476 (69.8%) |  |
| Class B | 2,904 (18.5%) | 3,469 (21.1%) |  |
| Class C | 510 (3.3%) | 747 (4.5%) |  |
| Unknown | 115 (0.7%) | 751 (4.6%) |  |
| MELD score | 8 (7-10) | 8 (7-11) | <0.001 |
| Type of initial treatment |  |  |  |
| Curatived | 6,586 (42.1%) | 5,282 (32.1%) | <0.001 |
| Non-curativee | 7,626 (48.7%) | 8,070 (49.1%) |  |
| Best supportive care | 1,443 (9.2%) | 3,091 (18.8%) |  |
| Initial treatment modality |  |  |  |
| Surgical resection | 5,162 (33.0%) | 3,304 (20.1%) | <0.001 |
| Liver transplantation | 211 (1.3%) | 156 (0.9%) |  |
| LAT | 1,213 (7.7%) | 1,822 (11.1%) |  |
| TACE/TARE | 6,825 (43.6%) | 6,839 (41.6%) |  |
| Radiotherapy | 186 (1.2%) | 245 (1.5%) |  |
| Systemic therapy | 615 (3.9%) | 986 (6.0%) |  |
| Best supportive care | 1,443 (9.2%) | 3,091 (18.8%) |  |

**Note**: Data are presented as mean ± standard deviation, median (interquartile range), or frequency (proportion).

**Abbreviations**: BCLC, Barcelona Clinic Liver Cancer; LAT, local ablation therapy; MELD, Model for End-stage Liver Disease; mUICC, modified Union for International Cancer Control; TACE, transarterial chemoembolization; TARE, transarterial radioembolization.

a Missing data was classified as a category.

b Hepatitis B was defined as any of the following: positive hepatitis B surface antigen, positive viral titer, or previous history of antiviral therapy.

c Hepatitis C was defined as any of the following: positive hepatitis C antibody, positive viral titer, or previous history of antiviral therapy.

d Curative treatment was defined as surgical resection, liver transplantation, and LAT.

e Non-curative treatment was defined as TACE/TARE, radiotherapy, and systemic therapy.

**SUPPLEMENTARY TABLE 2.** Baseline characteristics of propensity score-matched populationsa

| Variable | Single-center cohort  (n=9,713) | Multicenter cohort (n=9,713) | *P*-value | SMD |
| --- | --- | --- | --- | --- |
| Age (years) | 59.13 ± 10.70 | 59.19 ± 10.94 | 0.77 | 0.005 |
| Male | 7,830 (80.6%) | 1,811 (80.4%) | 0.74 | 0.005 |
| Body mass index (kg/㎡) | 24.08 ± 3.29 | 24.09 ± 3.37 | 0.98 | 0.003 |
| Diabetes mellitus | 2,167 (23.2%) | 3,233 (37.5%) | <0.001 | 0.31 |
| Hypertension | 2,993 (31.9%) | 2,426 (31.0%) | 0.24 | 0.02 |
| Hepatitis Bb | 6,299 (70.0%) | 6,358 (67.3%) | <0.001 | 0.06 |
| Hepatitis Cc | 993 (11.8%) | 1,030 (11.6%) | 0.75 | 0.005 |
| mUICC staging |  |  | 0.02 | 0.05 |
| Stage I | 1,481 (15.3%) | 1,573 (16.2%) |  |  |
| Stage II | 3,288 (33.9%) | 3,417 (35.2%) |  |  |
| Stage III | 3,048 (31.4%) | 2,847 (29.3%) |  |  |
| Stage IVA | 1,097 (11.3%) | 1 093 (11.3%) |  |  |
| Stage IVB | 799 (8.2%) | 783 (8.1%) |  |  |
| BCLC staging |  |  | <0.001 | 0.01 |
| Stage 0 | 1,414 (14.6%) | 1,168 (12.0%) |  |  |
| Stage A | 3,312 (34.1%) | 3,261 (33.6%) |  |  |
| Stage B | 1,205 (12.4%) | 2,093 (21.6%) |  |  |
| Stage C | 3,295 (33.9%) | 2,794 (28.8%) |  |  |
| Stage D | 487 (5.0%) | 397 (4.1%) |  |  |
| Child-Pugh class |  |  | 0.001 | 0.008 |
| Class A | 7,458 (76.8%) | 7,370 (75.9%) |  |  |
| Class B | 1,767 (18.2%) | 1,983 (20.4%) |  |  |
| Class C | 488 (5.0%) | 360 (3.7%) |  |  |
| MELD score | 8 (7–10) | 8 (7–11) | <0.001 | 0.05 |
| Type of initial treatment |  |  | 0.24 | 0.02 |
| Curatived | 3,432 (35.3%) | 3,545 (36.5%) |  |  |
| Non-curativee | 5,062 (52.1%) | 4,979 (51.3%) |  |  |
| Best supportive care | 1,219 (12.6%) | 1,189 (12.2%) |  |  |
| Initial treatment modality |  |  | 0.51 | 0.03 |
| Surgical resection | 2314 (23.8%) | 2440 (25.1%) |  |  |
| Liver transplantation | 105 (1.1%) | 110 (1.1%) |  |  |
| LAT | 1013 (10.4%) | 995 (10.2%) |  |  |
| TACE/TARE | 4388 (45.2%) | 4291 (44.2%) |  |  |
| Radiotherapy | 144 (1.5%) | 149 (1.5%) |  |  |
| Systemic therapy | 530 (5.5%) | 539 (5.5%) |  |  |
| Best supportive care | 1219 (12.6%) | 1189 (12.2%) |  |  |

**Note**: Data are presented as mean ± standard deviation, median (interquartile range), or frequency (proportion).

**Abbreviations**: BCLC, Barcelona Clinic Liver Cancer; LAT, local ablation therapy; MELD, Model for End-stage Liver Disease; mUICC, modified Union for International Cancer Control; SMD, standardized mean difference; TACE, transarterial chemoembolization; TARE, transarterial radioembolization.

a The factors taken into account in the propensity score matching were the following: sex, age, body mass index, Child-Pugh class, BCLC staging, mUICC staging, and initial treatment modality.

b Hepatitis B was defined as any of the following: positive hepatitis B surface antigen, positive viral titer, or previous history of antiviral therapy.

c Hepatitis C was defined as any of the following: positive hepatitis C antibody, positive viral titer, or previous history of antiviral therapy.

d Curative treatment was defined as surgical resection, liver transplantation, and local ablation therapy.

e Non-curative treatment was defined as TACE/TARE, radiotherapy, and systemic therapy.

**SUPPLEMENTARY TABLE 3.** Distribution of liver function by initial treatmenta

| Initial treatment modality  Child-Pugh class | Single-center cohort  (n=15,540) | Multicenter cohort (n=15,692) | *P*-value |
| --- | --- | --- | --- |
| Surgical resection | 5,126 (33.0%) | 3,240 (20.6%) | 0.02 |
| Class A | 4,902 (95.6%) | 3,098 (95.6%) |  |
| Class B | 208 (4.1%) | 138 (4.3%) |  |
| Class C | 16 (0.3%) | 4 (0.1%) |  |
| Liver transplantation | 210 (1.4%) | 153 (1.0%) | 0.01 |
| Class A | 63 (30.0%) | 68 (44.4%) |  |
| Class B | 94 (44.8%) | 49 (32.0%) |  |
| Class C | 53 (25.2%) | 36 (23.5%) |  |
| LAT | 1,187 (7.6%) | 1,766 (11.2%) | 0.47 |
| Class A | 980 (82.6%) | 1,482 (83.9%) |  |
| Class B | 186 (15.7%) | 249 (14.1%) |  |
| Class C | 21 (1.8%) | 35 (2.0%) |  |
| TACE/TARE | 6,781 (43.6%) | 6,527 (41.6%) | <0.001 |
| Class A | 5,344 (78.8%) | 4,963 (76.0%) |  |
| Class B | 1,364 (20.1%) | 1,413 (21.7%) |  |
| Class C | 73 (1.1%) | 151 (2.3%) |  |
| Radiotherapy | 184 (1.2%) | 237 (1.5%) | <0.001 |
| Class A | 73 (39.7%) | 138 (58.2%) |  |
| Class B | 88 (47.8%) | 90 (38.0%) |  |
| Class C | 23 (12.5%) | 9 (3.8%) |  |
| Systemic therapy | 615 (4.0%) | 946 (6.0%) | 0.002 |
| Class A | 339 (55.1%) | 585 (61.8%) |  |
| Class B | 251 (40.8%) | 334 (35.3%) |  |
| Class C | 25 (4.1%) | 27 (2.9%) |  |
| Best supportive care | 1,437 (9.2%) | 2,823 (18.0%) | <0.001 |
| Class A | 425 (29.6%) | 1,142 (40.5%) |  |
| Class B | 713 (49.6%) | 1,196 (42.4%) |  |
| Class C | 299 (20.8%) | 485 (17.2%) |  |

**Note**: Data are presented as frequency (proportion).

**Abbreviations**: LAT, local ablation therapy; TACE, transarterial chemoembolization; TARE, transarterial radioembolization.

a Missing data was excluded from the analysis.

**SUPPLEMENTARY TABLE 4.** Cox regression analysis of factors associated with mortality in the entire cohortsa

| Variable | Univariate analysis | | Multivariable analysis | |
| --- | --- | --- | --- | --- |
| HR (95% CI) | *P*-value | Adjusted HR (95% CI) | *P*-value |
| Cohort |  |  |  |  |
| Single-center | 1 (reference) |  | 1 (reference) |  |
| Multicenter | 1.55 (1.50–1.59) | <0.001 | 1.17 (1.13–1.20) | <0.001 |
| Age ≥ 60 years | 1.22 (1.19–1.26) | <0.001 | 1.14 (1.10–1.18) | <0.001 |
| Female (vs. Male) | 0.83 (0.80–0.87) | <0.001 | 0.93 (0.89–0.96) | <0.001 |
| Hepatitis Bb | 0.77 (0.75–0.79) | <0.001 | 0.96 (0.92–0.99) | 0.02 |
| Unknown | 0.70 (0.65–0.75) | <0.001 | 0.92 (0.85–0.99) | 0.03 |
| Hepatitis Cc | 1.18 (1.13–1.24) | <0.001 | 1.07 (1.02–1.13) | 0.006 |
| Unknown | 0.83 (0.79–0.87) | <0.001 | 0.98 (0.92–1.03) | 0.37 |
| Modified UICC staging |  |  |  |  |
| Stage I | 1 (reference) | <0.001 | 1 (reference) | <0.001 |
| Stage II | 1.56 (1.47–1.65) | <0.001 | 1.49 (1.41–1.58) | <0.001 |
| Stage III | 3.81 (3.60–4.02) | <0.001 | 2.75 (2.60–2.91) | <0.001 |
| Stage IVA | 9.31 (8.75–9.91) | <0.001 | 5.49 (5.15–5.85) | <0.001 |
| Stage IVB | 14.57 (13.65–15.56) | <0.001 | 7.96(7.44–8.52) | <0.001 |
| Unknown | 6.87 (5.09–9.27) | <0.001 | 3.61 (2.67–4.88) | <0.001 |
| Child-Pugh class |  |  |  |  |
| Class A | 1 (reference) | <0.001 | 1 (reference) | <0.001 |
| Class B | 3.09 (2.99–3.19) | <0.001 | 2.01 (1.94–2.08) | <0.001 |
| Class C | 5.04 (4.73–5.37) | <0.001 | 3.18 (2.98–3.39) | <0.001 |
| Unknown | 1.86 (1.72–2.02) | <0.001 | 1.19 (1.10–1.30) | <0.001 |
| Type of initial treatment |  |  |  |  |
| Curatived | 1 (reference) | <0.001 | 1 (reference) | <0.001 |
| Non-curativee | 3.64 (3.50–3.78) | <0.001 | 2.39 (2.30–2.49) | <0.001 |
| Best supportive care | 12.89 (12.31–13.50) | <0.001 | 5.71 (5.42–6.01) | <0.001 |
| Initial treatment modality |  |  |  |  |
| Surgical resection | 1 (reference) | <0.001 |  |  |
| Liver transplantation | 0.76 (0.61–0.95) | 0.02 |  |  |
| LAT | 1.43 (1.33–1.54) | <0.001 |  |  |
| TACE/TARE | 3.55 (3.39–3.72) | <0.001 |  |  |
| Radiotherapy | 8.75 (7.83–9.78) | <0.001 |  |  |
| Systemic therapy | 14.82 (13.85–15.85) | <0.001 |  |  |
| Best supportive care | 14.70 (13.95–15.50) | <0.001 |  |  |

**Abbreviations**: CI, Confidence interval; HR, Hazard ratio; LAT, Local ablation therapy; mUICC, Union for International Cancer Control; TACE, Transarterial chemoembolization; TARE, Transarterial radioembolization.

a Missing data was classified as a category.

b Hepatitis B was defined as any of the following: positive hepatitis B surface antigen, positive viral titer, or previous history of antiviral therapy.

c Hepatitis C was defined as any of the following: positive hepatitis C antibody, positive viral titer, or previous history of antiviral therapy.

d Curative treatment was defined as surgical resection, liver transplantation, and LAT.

e Non-curative treatment was defined as TACE/TARE, radiotherapy, and systemic therapy.

**SUPPLEMENTARY TABLE 5.** Cox regression analysis of risk of mortality by initial treatment in the entire cohortsa

| Initial treatment modality | Univariate analysis | | Multivariable analysisb | |
| --- | --- | --- | --- | --- |
| HR (95% CI) | *P*-value | Adjusted HR (95% CI) | *P*-value |
| Surgical resection |  |  |  |  |
| Single-center (n=5,162) | 1 (reference) |  | 1 (reference) |  |
| Multicenter (n=3,304) | 1.38 (1.27–1.50) | <0.001 | 1.32 (1.21–1.44) | <0.001 |
| Liver transplantation |  |  |  |  |
| Single-center (n=211) | 1 (reference) |  | 1 (reference) |  |
| Multicenter (n=156) | 2.22 (1.41–3.51) | <0.001 | 1.91 (1.18–3.10) | 0.009 |
| LAT |  |  |  |  |
| Single-center (n=1,213) | 1 (reference) |  | 1 (reference) |  |
| Multicenter (n=1,822) | 1.64 (1.45–1.87) | <0.001 | 1.56 (1.35–1.79) | <0.001 |
| TACE/TARE |  |  |  |  |
| Single-center (n=6,825) | 1 (reference) |  | 1 (reference) |  |
| Multicenter (n=6,839) | 1.25 (1.20–1.31) | <0.001 | 1.24 (1.19–1.30) | <0.001 |
| Radiotherapy |  |  |  |  |
| Single-center (n=186) | 1 (reference) |  | 1 (reference) |  |
| Multicenter (n=245) | 1.16 (0.94–1.43) | 0.16 | 1.14 (0.92–1.43) | 0.23 |
| Systemic therapy |  |  |  |  |
| Single-center (n=615) | 1 (reference) |  | 1 (reference) |  |
| Multicenter (n=986) | 0.86 (0.78–0.96) | 0.007 | 0.82 (0.74–0.92) | 0.001 |
| Curative treatmentc |  |  |  |  |
| Single-center (n=6,586) | 1 (reference) | <0.001 | 1 (reference) | <0.001 |
| Multicenter (n=5,282) | 1.54 (1.44–1.65) | <0.001 | 1.50 (1.40–1.60) | <0.001 |
| Non-curative treatmentd |  |  |  |  |
| Single-center (n=7,626) | 1 (reference) | <0.001 | 1 (reference) | <0.001 |
| Multicenter (n=8,070) | 1.28 (1.23–1.33) | <0.001 | 1.22 (1.18–1.27) | <0.001 |
| Best supportive care |  |  |  |  |
| Single-center (n=1,443) | 1 (reference) | <0.001 | 1 (reference) | <0.001 |
| Multicenter (n=3,091) | 0.85 (0.80–0.91) | <0.001 | 0.86 (0.80–0.92) | <0.001 |

**Abbreviations**: CI, confidence interval; HR, hazard ratio; LAT, local ablation therapy ablation; TACE, transarterial chemoembolization; TARE, transarterial radioembolization.

a Missing data was classified as a category.

b Adjusted for sex, age, hepatitis B, hepatitis C, Child-Pugh class, and modified Union for International Cancer Control (mUICC) staging.

c Curative treatment was defined as surgical resection, liver transplantation, and LAT.

d Non-curative treatment was defined as TACE/TARE, radiotherapy, and systemic therapy.

**SUPPLEMENTARY TABLE 6.** Cox regression analysis of risk of mortality by initial treatment in BCLC-guided subcohortsa

| Initial treatment modality | Univariate analysis | | Multivariable analysisb | |
| --- | --- | --- | --- | --- |
| HR (95% CI) | *P*-value | Adjusted HR (95% CI) | *P*-value |
| Surgical resection |  |  |  |  |
| Single-center (n=3,771) | 1 (reference) |  | 1 (reference) |  |
| Multicenter (n=1,481) | 1.10 (0.96–1.26) | 0.17 | 1.06 (0.93–1.22) | 0.38 |
| Liver transplantation |  |  |  |  |
| Single-center (n=146) | 1 (reference) |  | 1 (reference) |  |
| Multicenter (n=90) | 1.35 (0.69–2.66) | 0.38 | 1.09 (0.54–2.18) | 0.82 |
| LAT |  |  |  |  |
| Single-center (n=280) | 1 (reference) |  | 1 (reference) |  |
| Multicenter (n=346) | 1.42 (1.07–1.90) | 0.02 | 1.45 (1.08–1.95) | 0.01 |
| TACE |  |  |  |  |
| Single-center (n=661) | 1 (reference) |  | 1 (reference) |  |
| Multicenter (n=366) | 1.74 (1.50–2.02) | <0.001 | 1.73 (1.49–2.02) | <0.001 |
| Systemic therapy |  |  |  |  |
| Single-center (n=293) | 1 (reference) |  | 1 (reference) |  |
| Multicenter (n=514) | 0.93 (0.80–1.08) | 0.33 | 0.94 (0.81–1.10) | 0.46 |

**Abbreviations**: BCLC, Barcelona Clinic Liver Cancer; CI, confidence interval; HR, hazard ratio; LAT, local ablation therapy; TACE, transarterial chemoembolization.

a Missing data was classified as a category.

b Adjusted for sex, age, hepatitis B, hepatitis C, Child-Pugh class, and modified Union for International Cancer Control (mUICC) staging.

**SUPPLEMENTARY TABLE 7.** Cox regression analysis of risk of mortality by initial treatment in Child-Pugh Class B subcohortsa

| Initial treatment modality | Univariate analysis | | Multivariable analysisb | |
| --- | --- | --- | --- | --- |
| HR (95% CI) | *P*-value | Adjusted HR (95% CI) | *P*-value |
| Surgical resection |  |  |  |  |
| Single-center (n=208) | 1 (reference) |  | 1 (reference) |  |
| Multicenter (n=138) | 1.16 (0.85–1.58) | 0.34 | 1.14 (0.83–1.55) | 0.42 |
| Liver transplantation |  |  |  |  |
| Single-center (n=94) | 1 (reference) |  | 1 (reference) |  |
| Multicenter (n=49) | 2.02 (0.95–4.31) | 0.07 | 2.03 (0.94–4.39) | 0.07 |
| LAT |  |  |  |  |
| Single-center (n=186) | 1 (reference) |  | 1 (reference) |  |
| Multicenter (n=249) | 1.53 (1.19–1.98) | <0.001 | 1.26 (0.97–1.64) | 0.09 |
| TACE |  |  |  |  |
| Single-center (n=1364) | 1 (reference) |  | 1 (reference) |  |
| Multicenter (n=1413) | 1.07 (0.98–1.16) | 0.14 | 1.10 (1.01–1.20) | 0.03 |
| Systemic therapy |  |  |  |  |
| Single-center (n=251) | 1 (reference) |  | 1 (reference) |  |
| Multicenter (n=334) | 0.86 (0.72–1.01) | 0.07 | 0.72 (0.60–0.86) | <0.001 |

**Abbreviations**: CI, confidence interval; HR, hazard ratio; LAT, local ablation therapy; TACE, transarterial chemoembolization.

a Missing data was classified as a category.

b Adjusted for sex, age, hepatitis B, hepatitis C, Child-Pugh class, and modified Union for International Cancer Control (mUICC) staging.

**SUPPLEMENTARY TABLE 8.** Subgroup analysisa

| Subgroup | Single-center cohort | | Multicenter cohort | |  | |  |
| --- | --- | --- | --- | --- | --- | --- | --- |
| Cases | Events (%) | Cases | Events (%) | Crude HR (95% CI)b | *P*-value | *P* for interaction |
| Sex |  |  |  |  |  |  | 0.013 |
| Male | 12,690 | 6,126 (48.3%) | 13,045 | 8,893 (68.2%) | 1.52 (1.48–1.58) | <0.001 |  |
| Female | 2,965 | 1,190 (40.1%) | 3,398 | 2,142 (63.0%) | 1.68 (1.57–1.81) | <0.001 |  |
| mUICC staging |  |  |  |  |  |  | <0.001 |
| Stage I | 2,626 | 527 (20.1%) | 2,532 | 1,058 (41.8%) | 2.13 (1.91–2.36) | <0.001 |  |
| Stage II | 6,176 | 1,991 (32.2%) | 6,168 | 3,273 (53.1%) | 1.65 (1.56–1.74) | <0.001 |  |
| Stage III | 4,712 | 2,954 (62.7%) | 4,147 | 3,267 (78.8%) | 1.29 (1.23–1.36) | <0.001 |  |
| Stage IVA | 1,291 | 1,100 (85.2%) | 1,920 | 1,807 (94.1%) | 1.32 (1.23–1.42) | <0.001 |  |
| Stage IVB | 850 | 744 (87.5%) | 1,627 | 1,586 (97.5%) | 1.34 (1.23–1.46) | <0.001 |  |
| Unknown | 0 | 0 (0.0%) | 49 | 44 (89.8%) | 2.13 (1.91–2.36) | <0.001 |  |
| Child-Pugh class |  |  |  |  |  |  | <0.001 |
| Class A | 12,126 | 4,738 (39.1%) | 11,476 | 6,717 (58.5%) | 1.55 (1.49–1.61) | <0.001 |  |
| Class B | 2,904 | 2,156 (74.2%) | 3,469 | 3,039 (87.6%) | 1.26 (1.19–1.33) | <0.001 |  |
| Class C | 510 | 391 (76.7%) | 747 | 686 (91.8%) | 1.53 (1.35–1.73) | <0.001 |  |
| Unknown | 115 | 31 (27.0%) | 751 | 593 (79.0%) | 4.50 (3.14–6.46) | <0.001 |  |
| Type of initial treatment |  |  |  |  |  |  | <0.001 |
| Curativec | 6,586 | 1,523 (23.1%) | 5,282 | 1,945 (36.8%) | 1.58 (1.47–1.69) | <0.001 |  |
| Non-curatived | 7,626 | 4,533 (59.4%) | 8,070 | 6,222 (77.1%) | 1.27 (1.22–1.32) | <0.001 |  |
| Best supportive care | 1,443 | 1,260 (87.3%) | 3,091 | 2,868 (92.8%) | 0.75 (0.70–0.80) | <0.001 |  |

**Abbreviations**: CI, confidence interval; HR, hazard ratio; mUICC, modified Union for International Cancer Control.

a Missing data was classified as a category.

b Crude hazard ratio for multicenter vs. single-center cohort.

c Curative treatment was defined as surgical resection, liver transplantation, and local ablation therapy.

d Non-curative treatment was defined as TACE/TARE, radiotherapy, and systemic therapy.

**SUPPLEMENTARY TABLE 9.** Overview of differences in overall survivala

| Overall survival of entire cohorts | | Risk of mortalityb | | Reference |
| --- | --- | --- | --- | --- |
| Adjusted HR (95% CI) | *P*-value |
| Entire cohorts | |  |  |  |
| Single-center (n=15,655) | | 1 (reference) |  | - Larger treatment effect estimates in single-center trials 1-3 - Center variability in qualitative factors undetected by current staging systems and methods of statistical analysis employed |
| Multicenter (n=16,443) | | **1.16** (1.13–1.20) | <0.001 |
| Curative treatmentc | |  |  |  |
| Single-center (n=6,586) | | 1 (reference) |  | - Relatively homogeneous treatment indications and standardized interventions with expertise in high-volume single-centers 1,2,4 - Treatment outcomes of small-volume centers with higher mortality included in multicenter series 5,6 |
| Multicenter (n=5,282) | | **1.48** (1.39–1.59) | <0.001 |
| Non-curative treatmentd | |  |  |
| Single-center (n=7,626) | | 1 (reference) |  |
| Multicenter (n=8,070) | | **1.22** (1.17–1.27) | <0.001 |
| Best supportive care | |  |  |  |
| Single-center (n=1,443) | | 1 (reference) |  | - Poorer liver function in single-center cohort patients who received best supportive care (refer to Supplementary table 3, 7) - Improved outcomes in patients with early incorporation of palliative care 8,9 |
| Multicenter (n=3,091) | | **0.85** (0.80–0.91) | <0.001 |
| Overall survival of BCLC-guided subcohorts | | Risk of mortalityb | | Reference |
| Adjusted HR (95% CI) | *P*-value |
| Surgical resection | |  |  |  |
| Single-center (n=3,771) | | 1 (reference) |  | - Decreased gap in treatment outcomes due to advances in surgical technique and perioperative care 10 - No significant association between center type or volume and surgical outcomes 11-13 |
| Multicenter (n=1,481) | | 1.07 (0.93–1.23) | 0.33 |
| Liver transplantation | |  |  |  |
| Single-center (n=146) | | 1 (reference) |  | - Post-transplant survival associated with donor age, patient age, MELD score than center volume 14 |
| Multicenter (n=90) | | 1.30 (0.65–2.60) | 0.45 |
| LAT | |  |  |  |
| Single-center (n=280) | | 1 (reference) |  | - Specialized nature of interventional radiology 15-17 - Impact of level of expertise upon efficacy of non-pharmacologic interventions 18-20 |
| Multicenter (n=346) | | **1.44** (1.08–1.92) | 0.01 |
| TACE | |  |  |
| Single-center (n=661) | | 1 (reference) |  |
| Multicenter (n=366) | | **1.72** (1.48–2.00) | <0.001 |
| Systemic therapy | |  |  |  |
| Single-center (n=293) | 1 (reference) |  | - Limited options of approved systemic therapy for advanced HCC within study period 21 | |
| Multicenter (n=514) | **0.94** (0.81–1.10) | 0.44 |

**Note: Bolded text** indicates statistically significant results (two-sided *P*-values≤0.05)

**Abbreviations**: CI, confidence interval; HR, hazard ratio; LAT, local ablation therapy ablation; TACE, transarterial chemoembolization

a Missing data was imputed.

b Risk of mortality was assessed using multivariable analysis adjusted for sex, age, hepatitis B, hepatitis C, Child-Pugh class, and modified Union for International Cancer Control (mUICC) staging.

c Curative treatment was defined as surgical resection, liver transplantation, and LAT.

d Non-curative treatment was defined as TACE/TARE, radiotherapy, and systemic therapy.

**SUPPLEMENTARY FIGURES**

**SUPPLEMENTARY FIGURE 1.** Kaplan-Meier estimates of overall survival in PS-matched cohorts


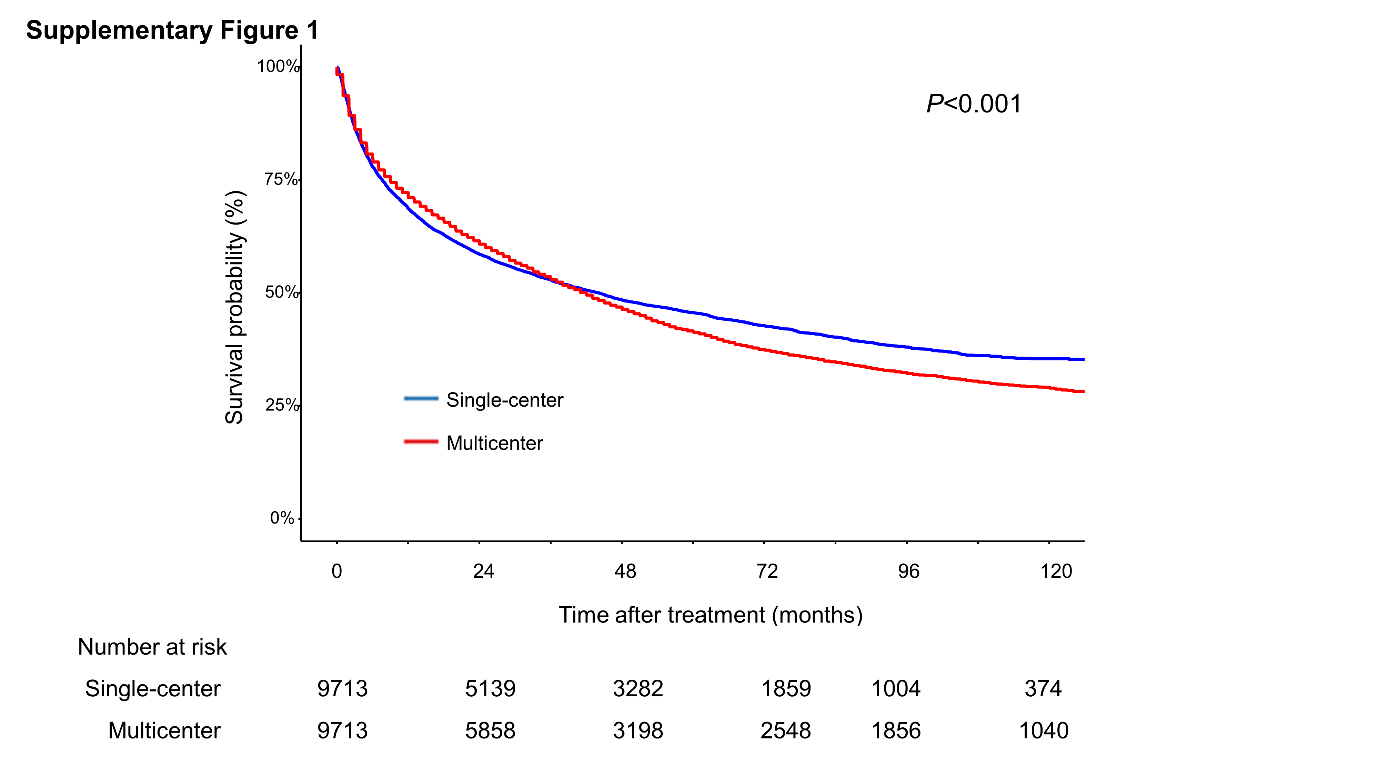


**SUPPLEMENTARY FIGURE 2.** Kaplan-Meier estimates of overall survival according to (A) male and (B) female sex


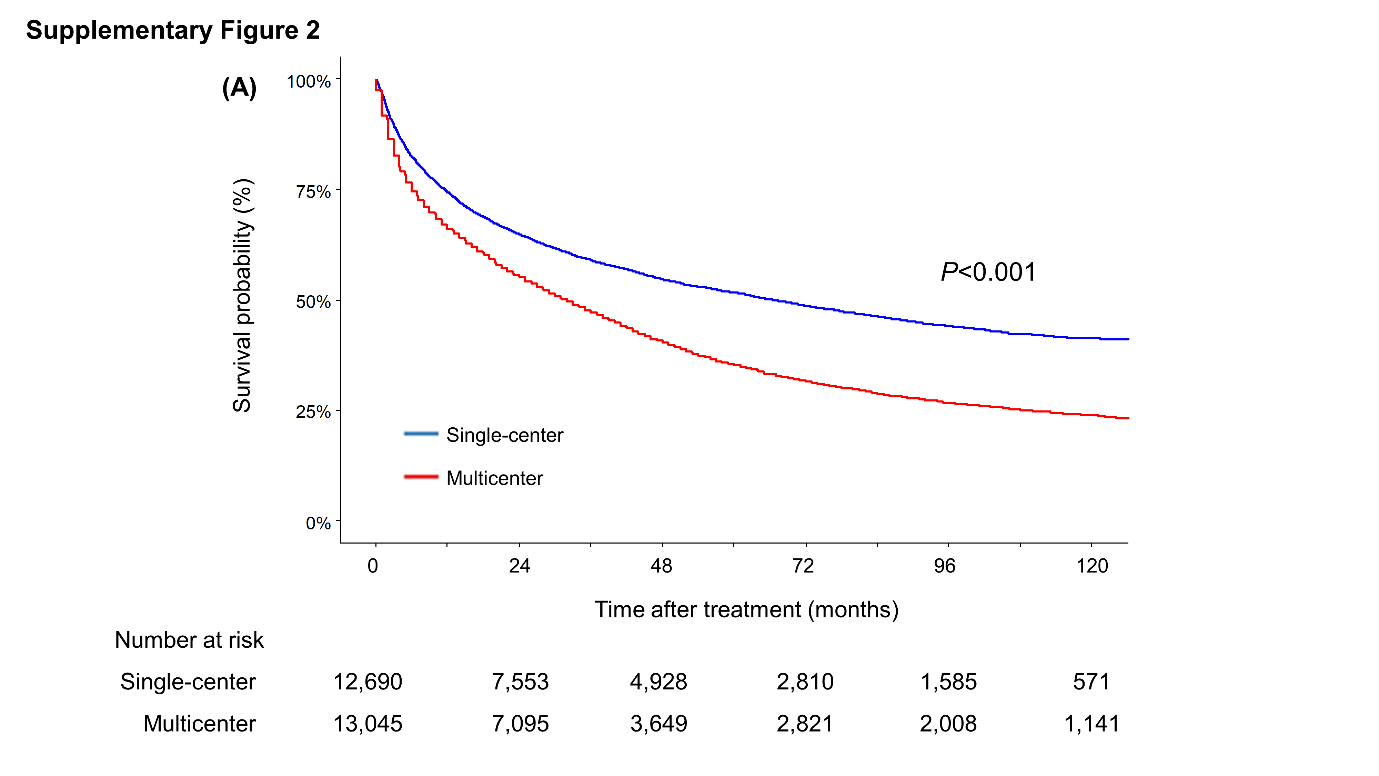

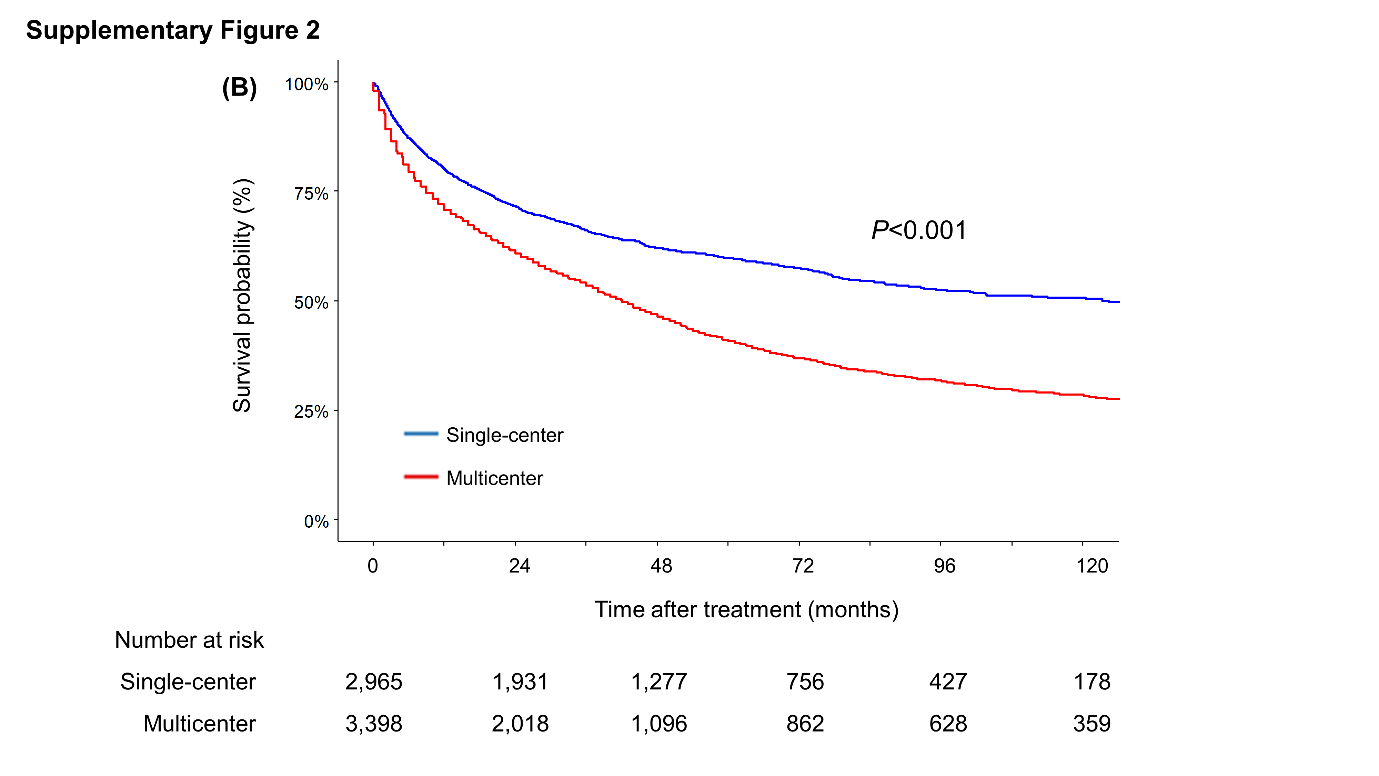


**SUPPLEMENTARY FIGURE 3.** Kaplan-Meier estimates of overall survival according to liver function of (A) Child-Pugh class A, (B) Child-Pugh class B, and (C) Child-Pugh class C

**
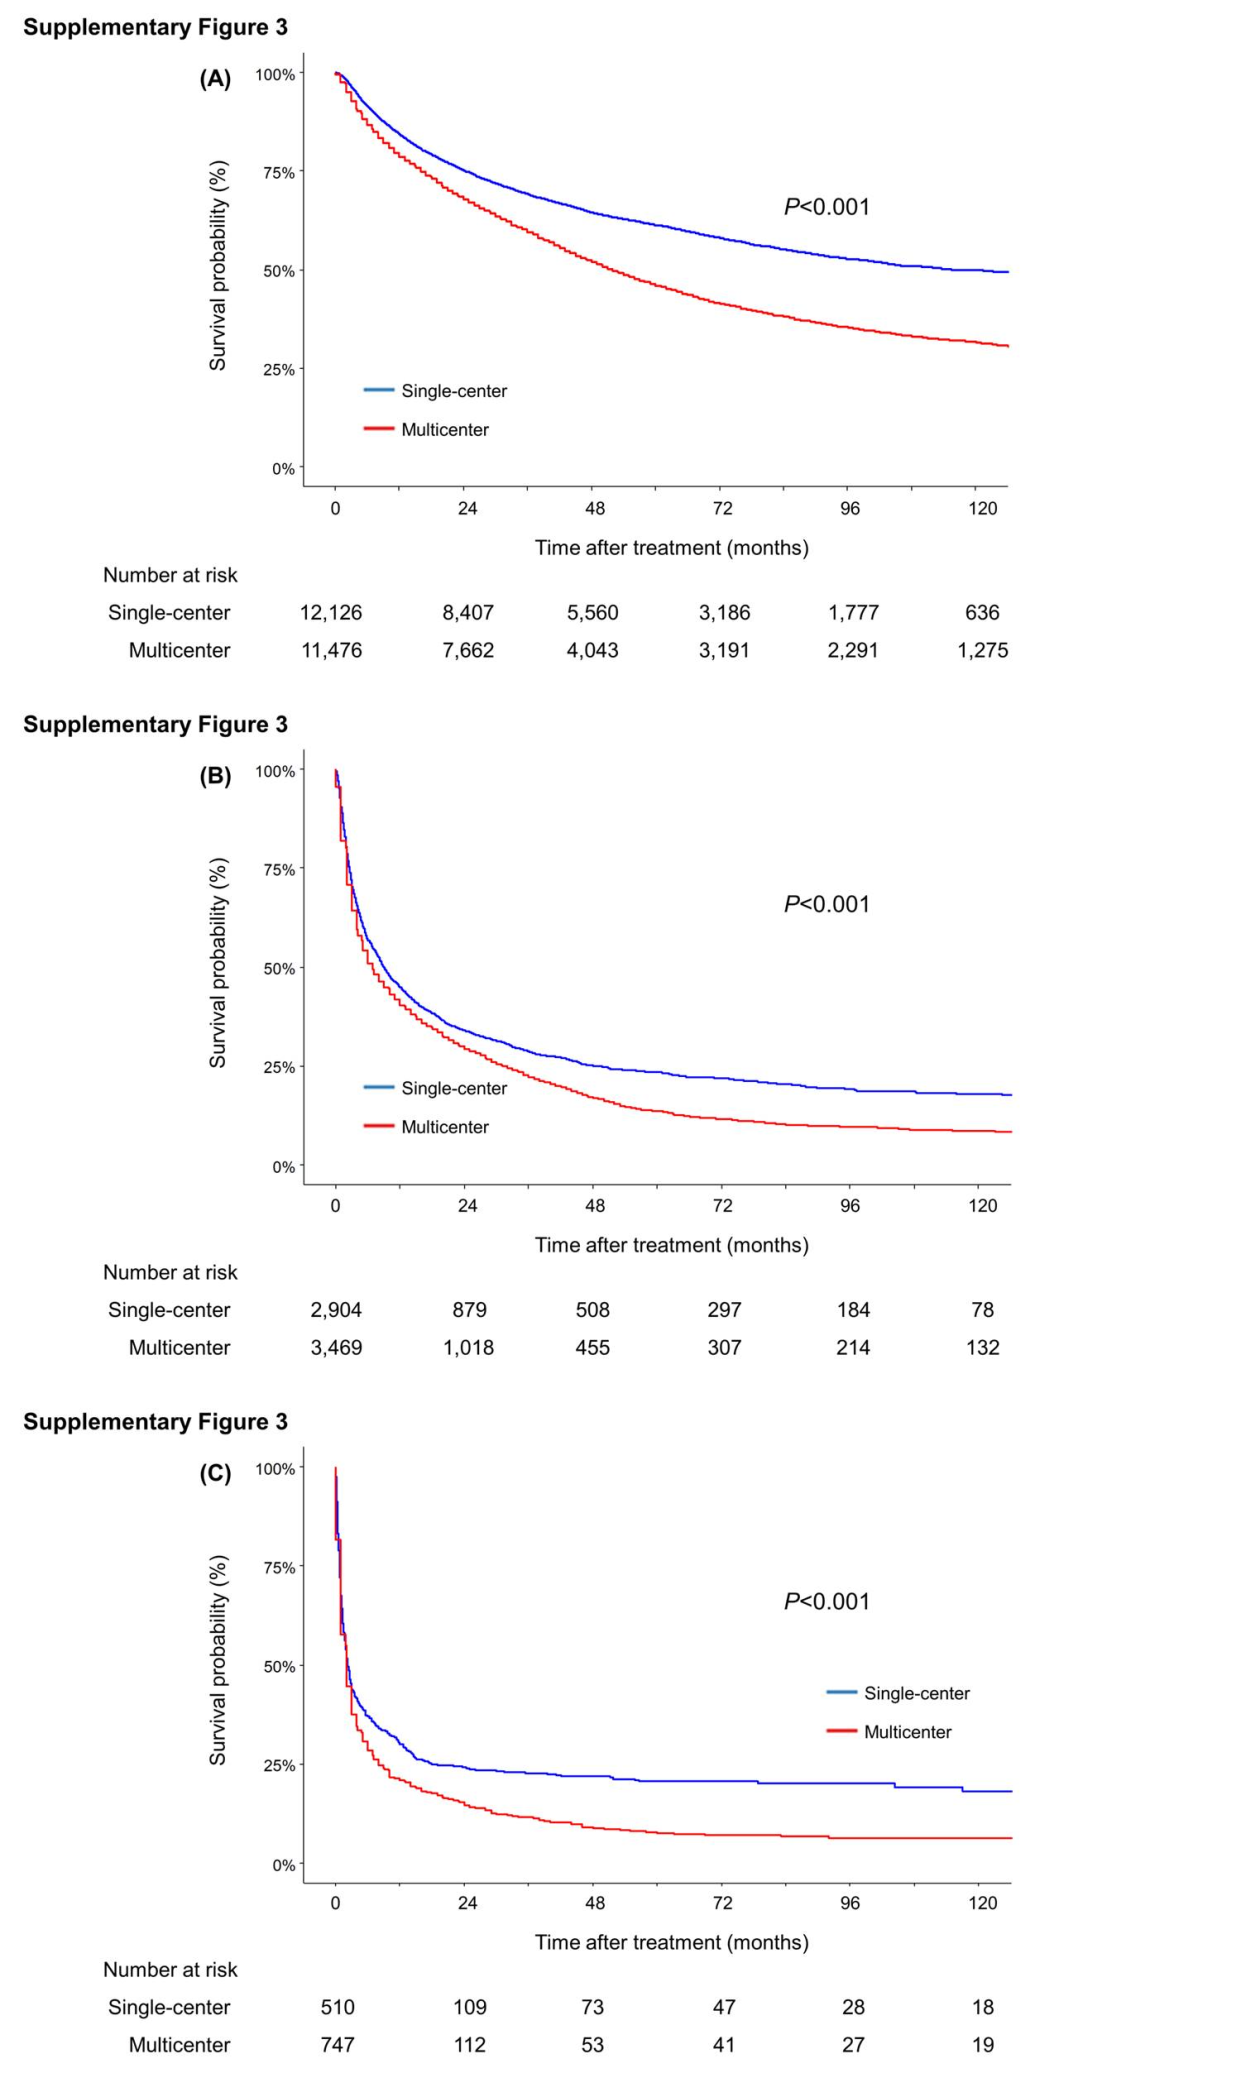

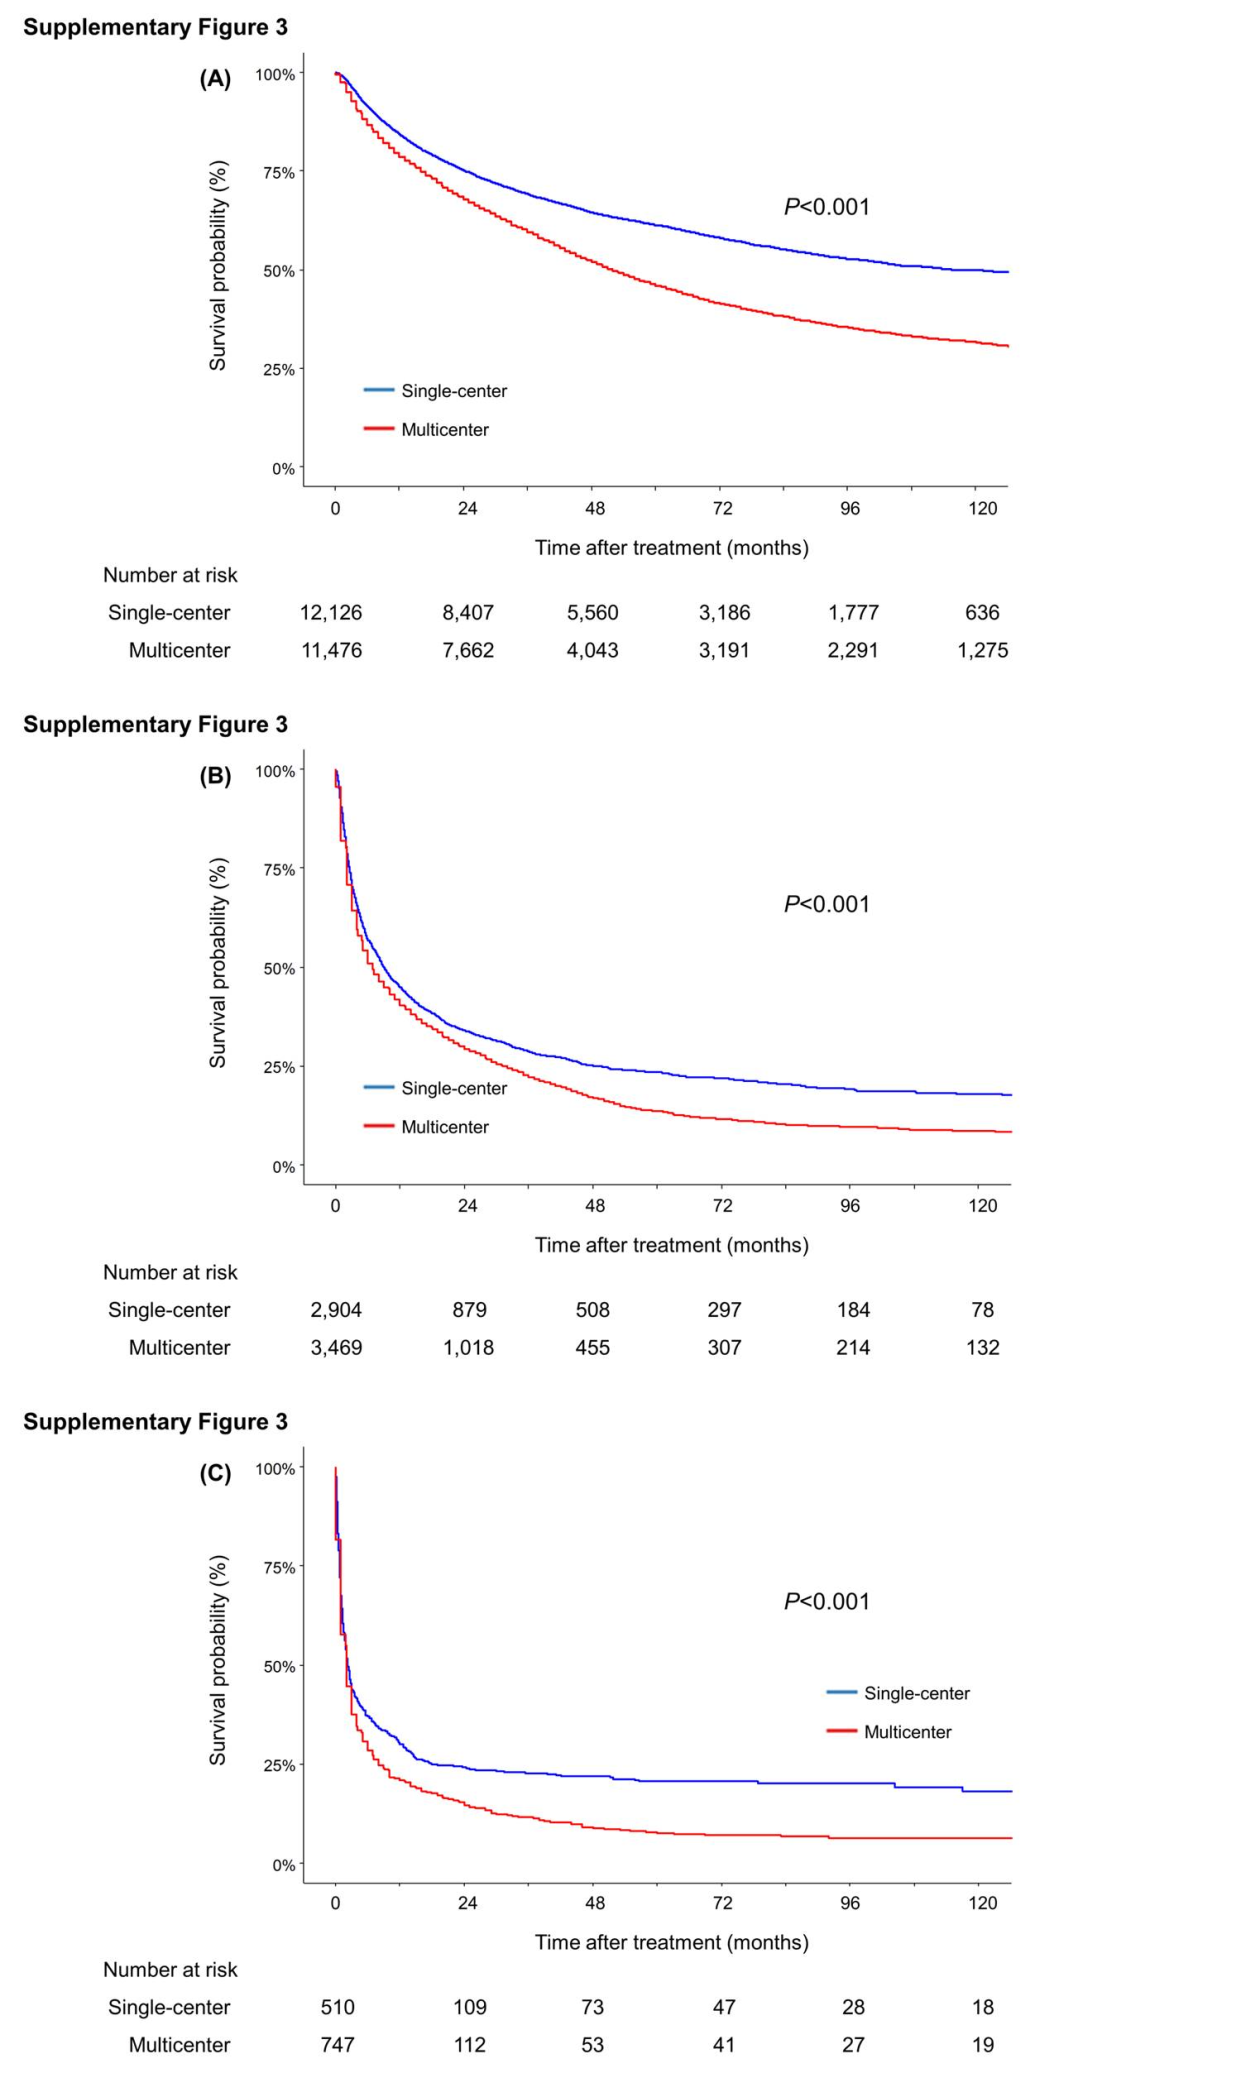

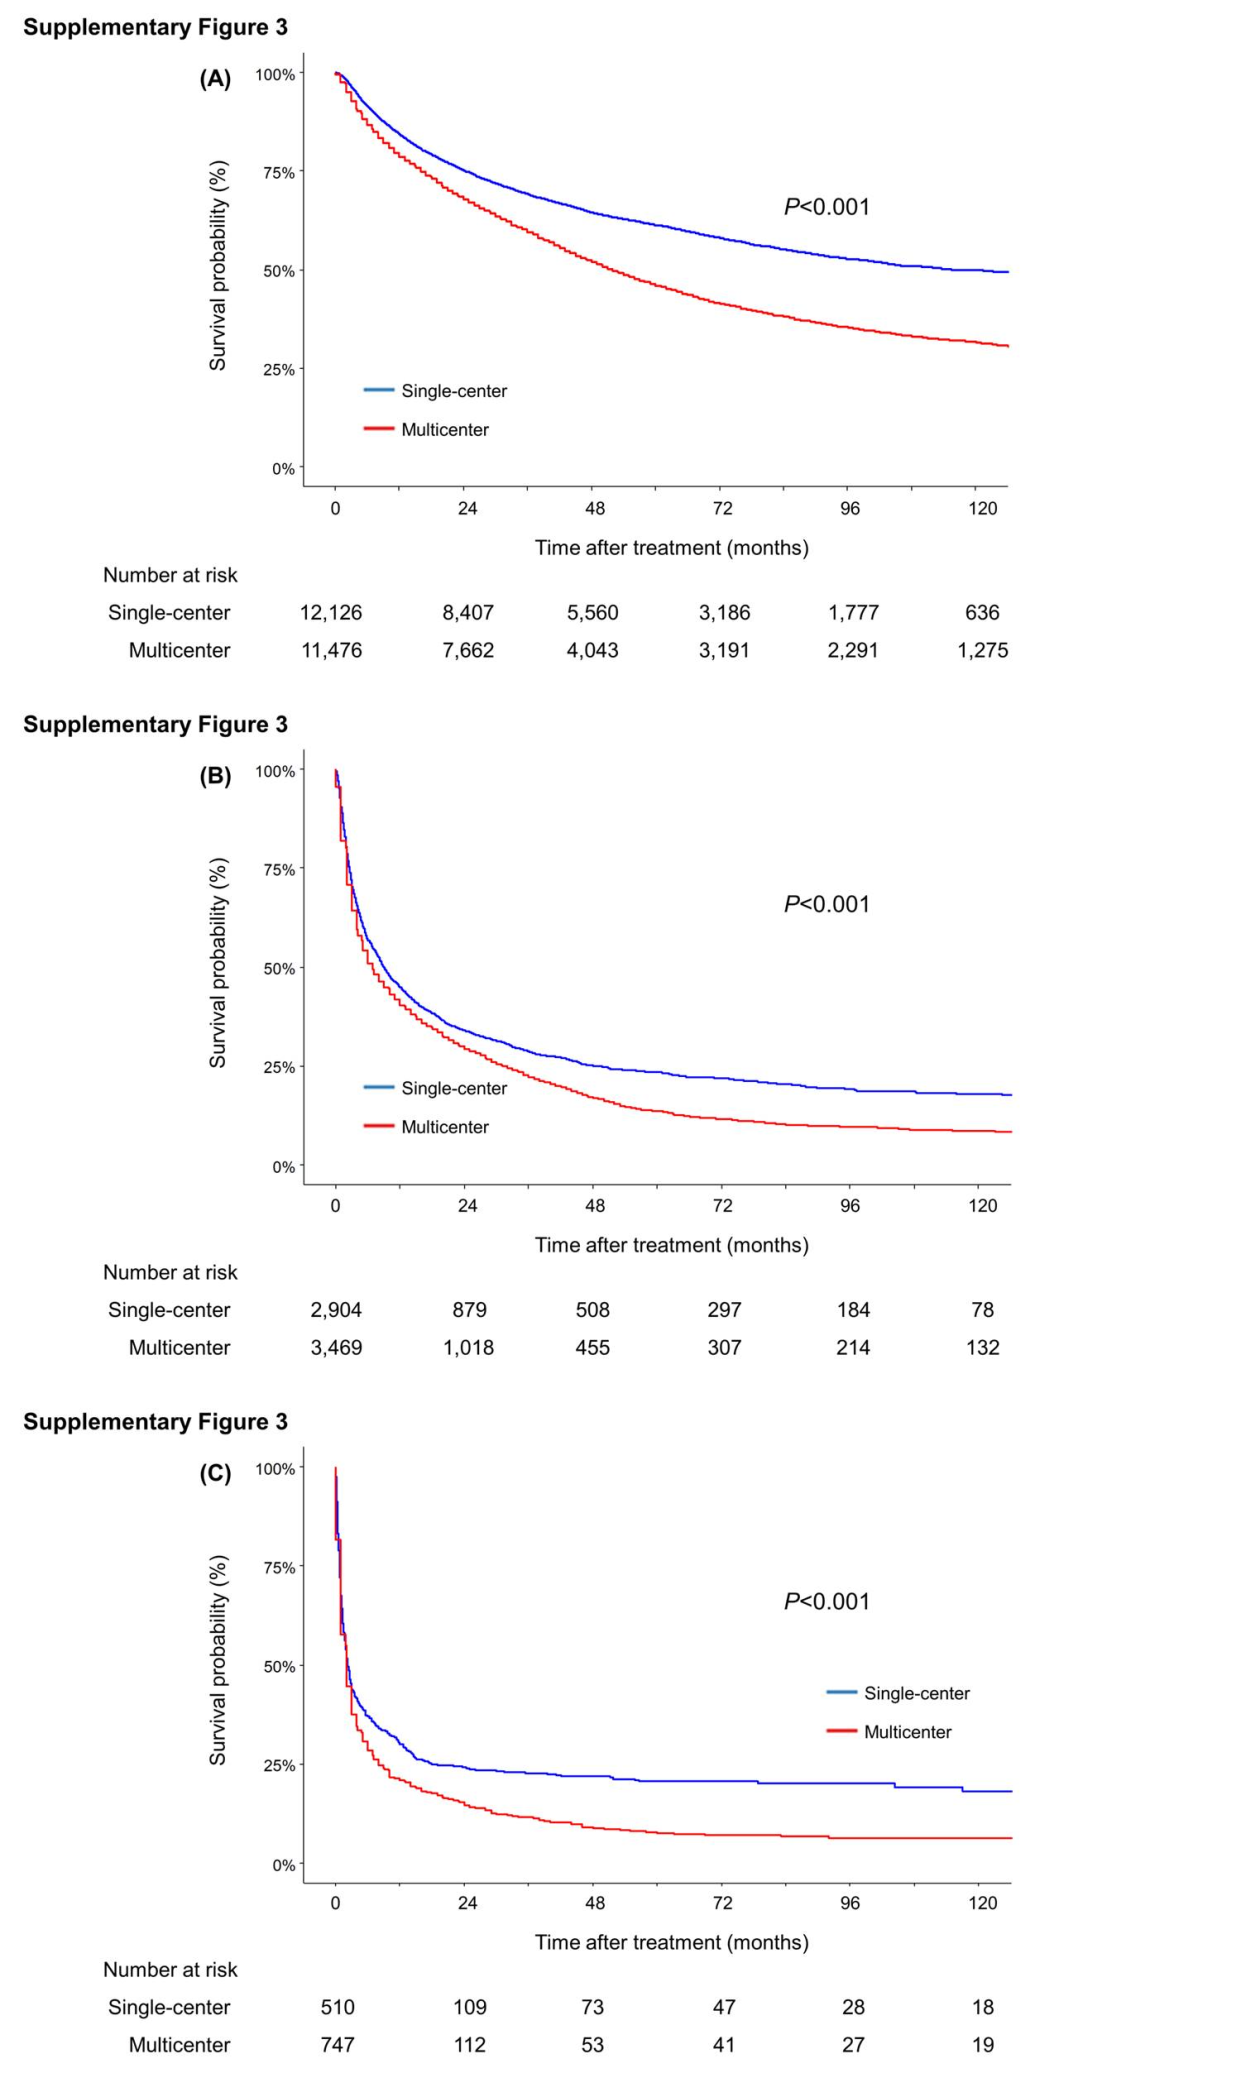
**

**SUPPLEMENTARY FIGURE 4.** Kaplan–Meier estimates of overall survival according to mUICC stage (A) I, (B) II, (C) III, (D) IVA, and (E) IVB

Abbreviations: mUICC, modified Union for International Cancer Control (mUICC) staging

**
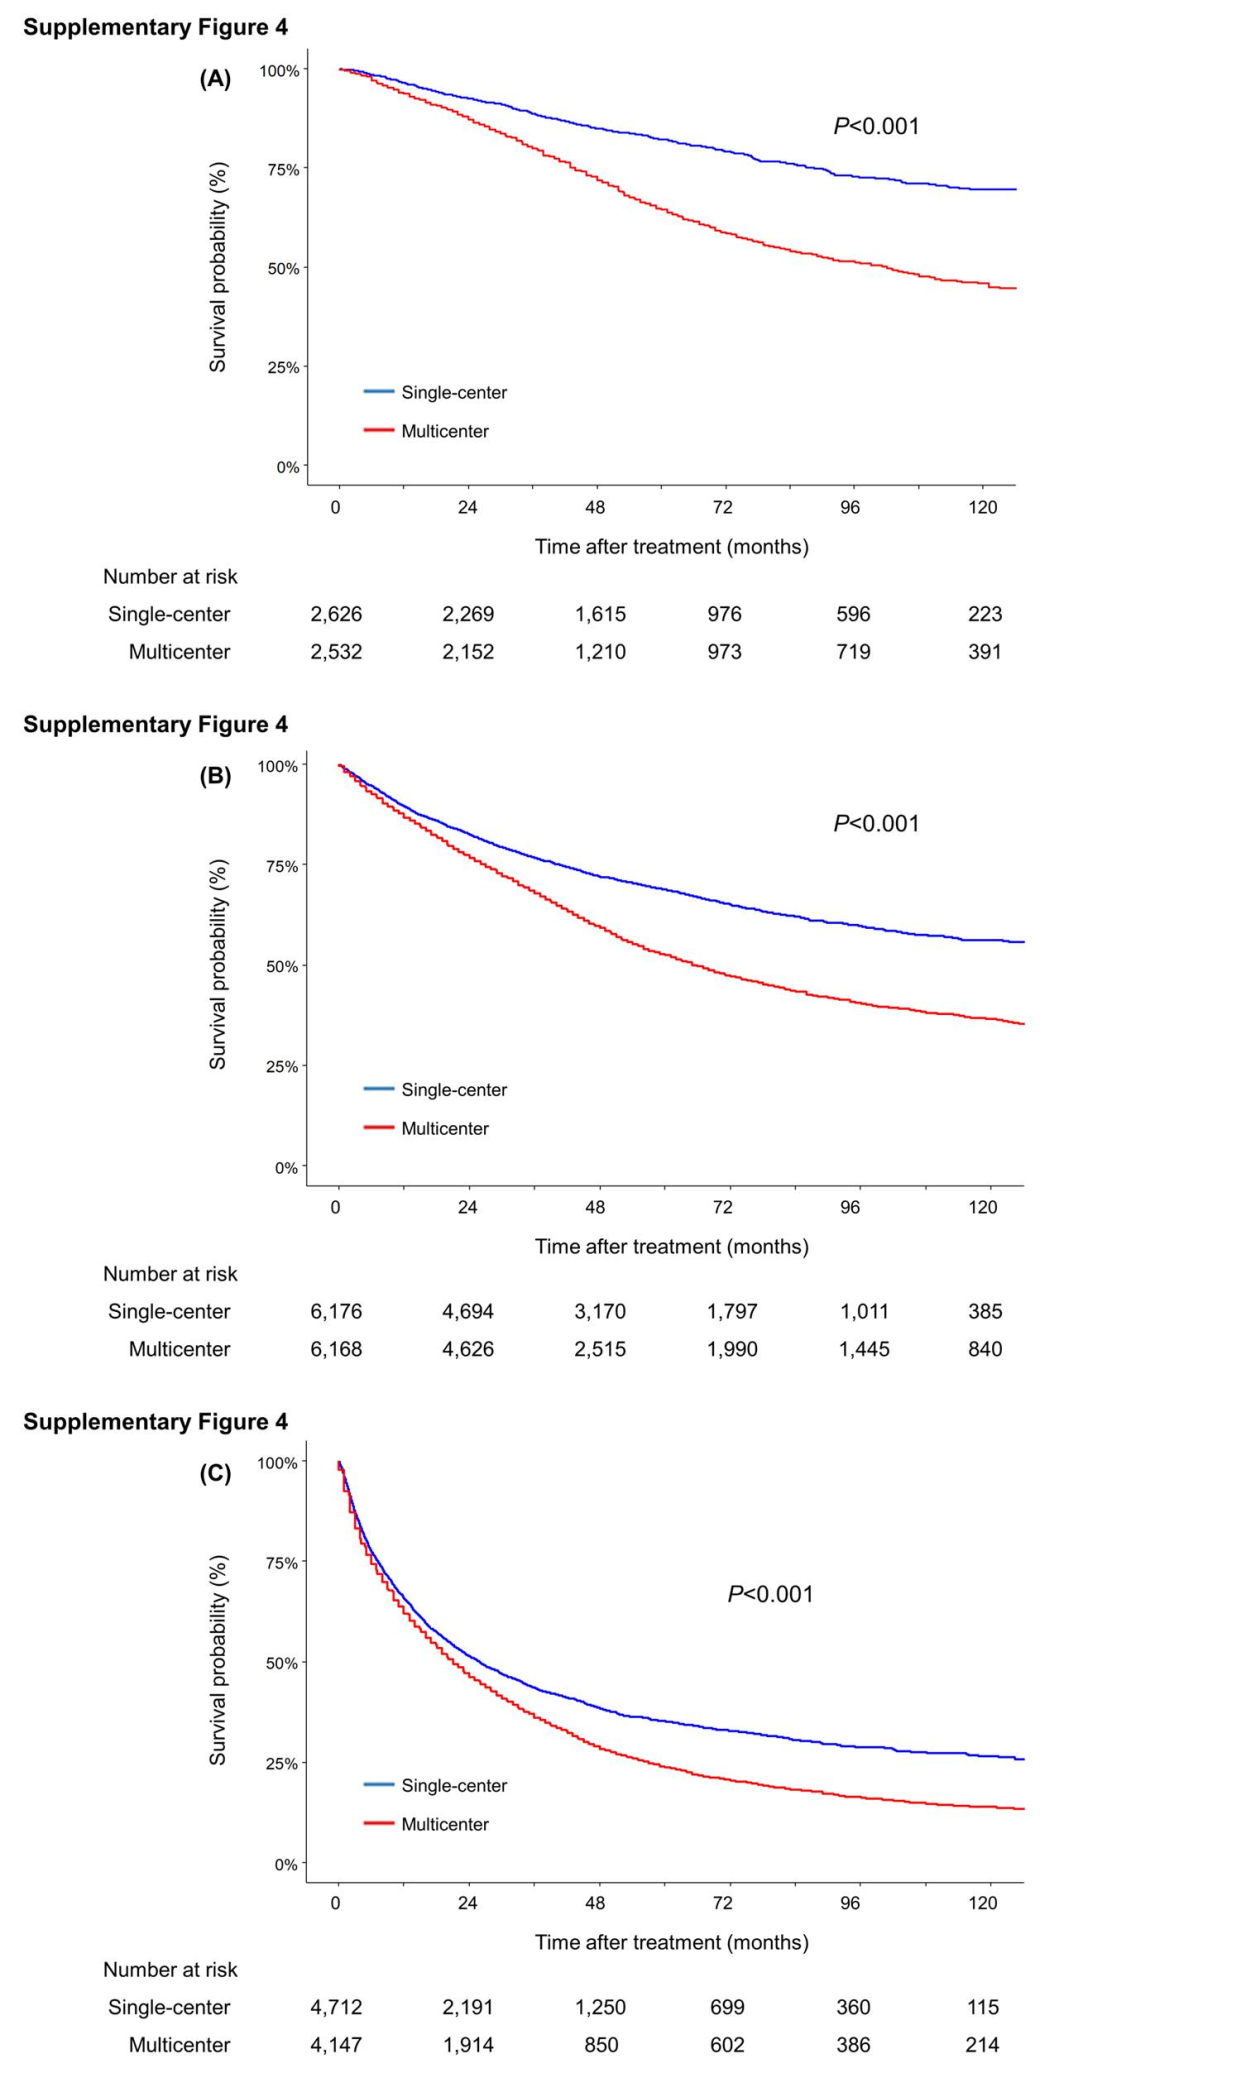

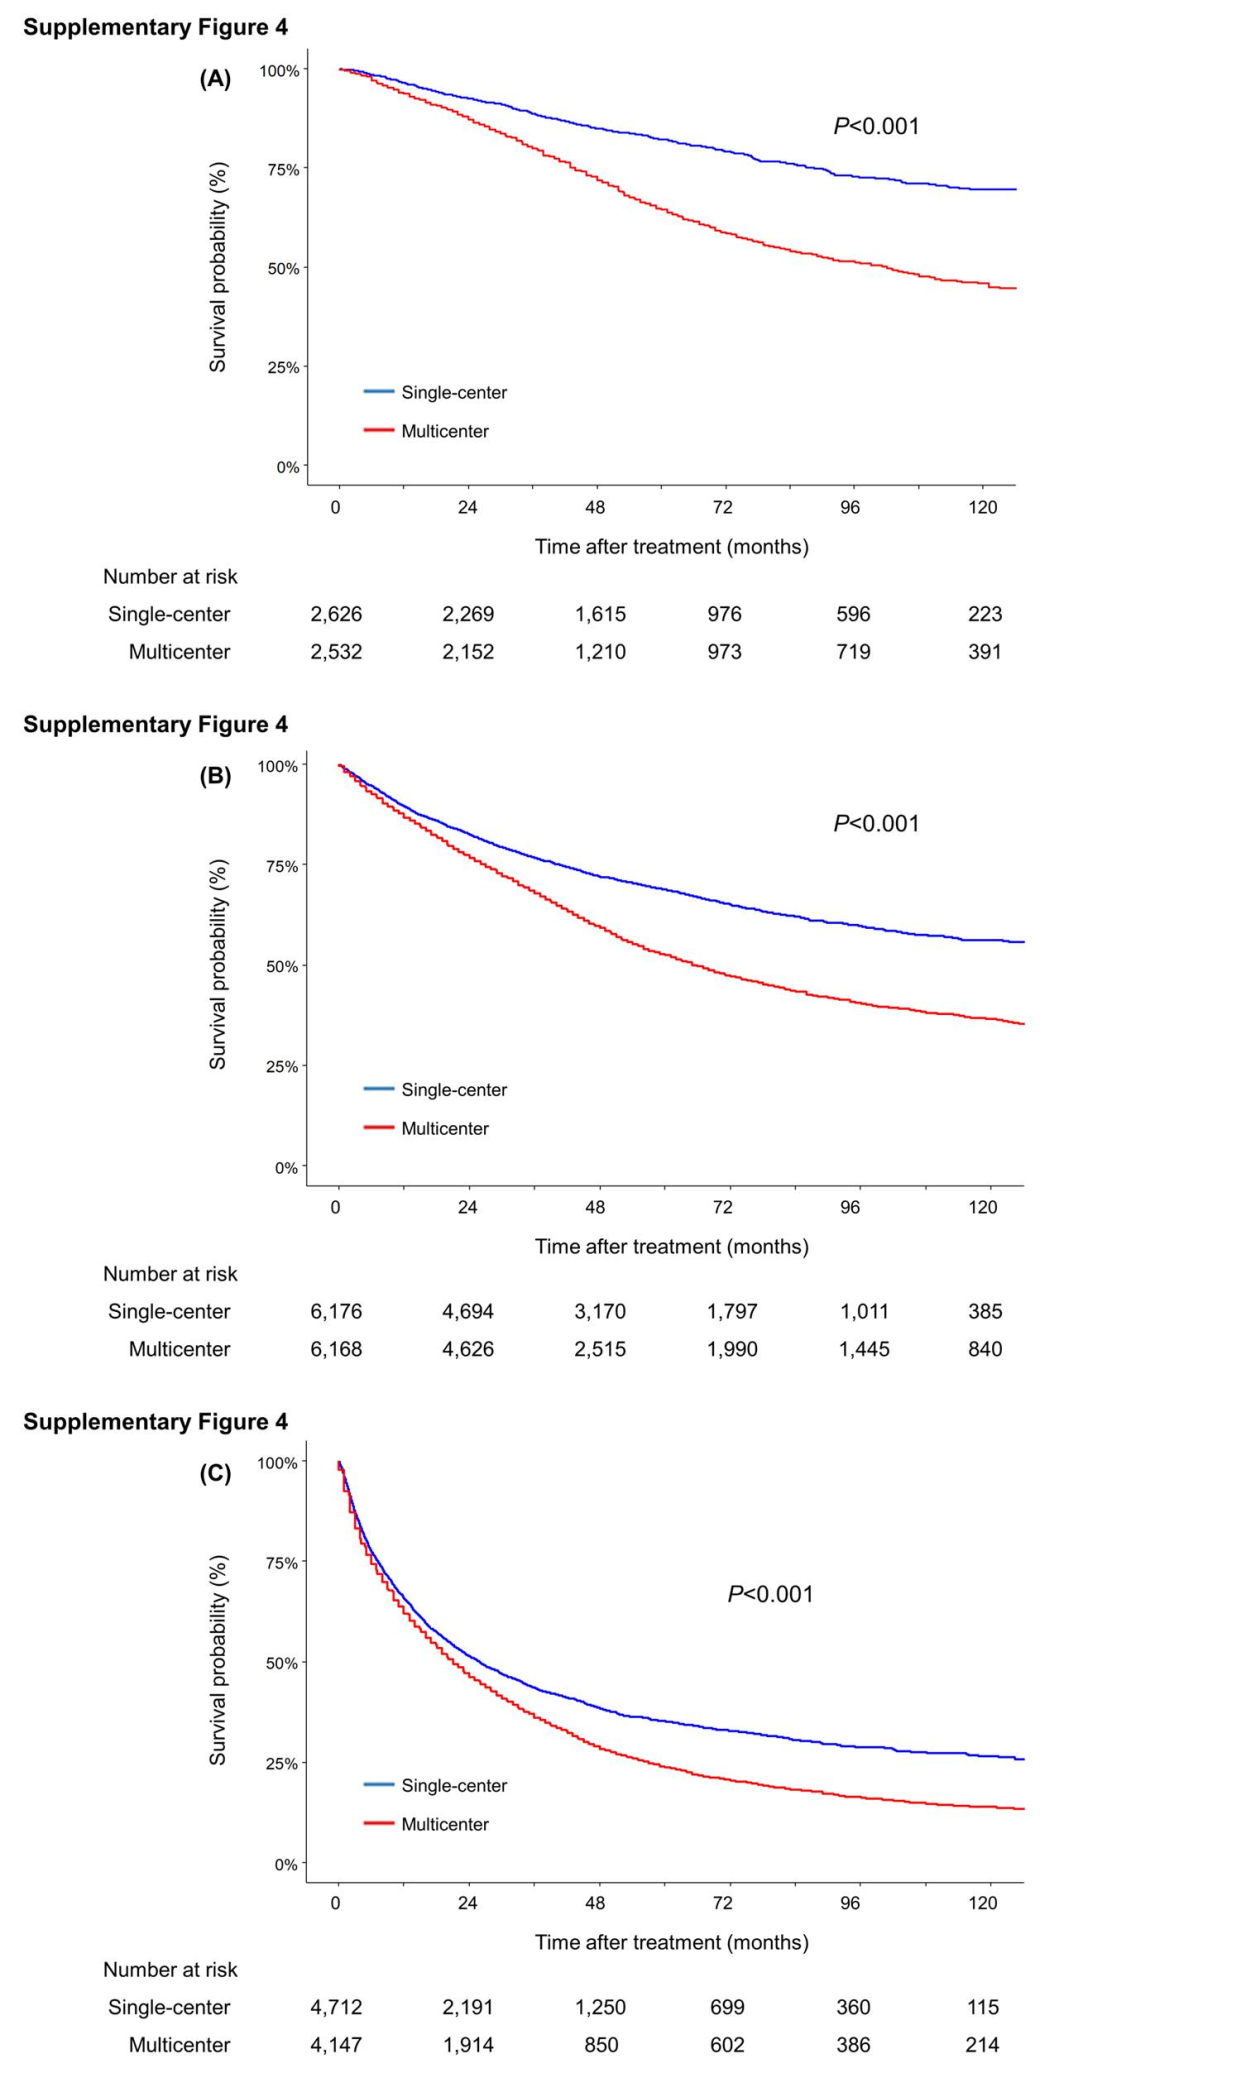

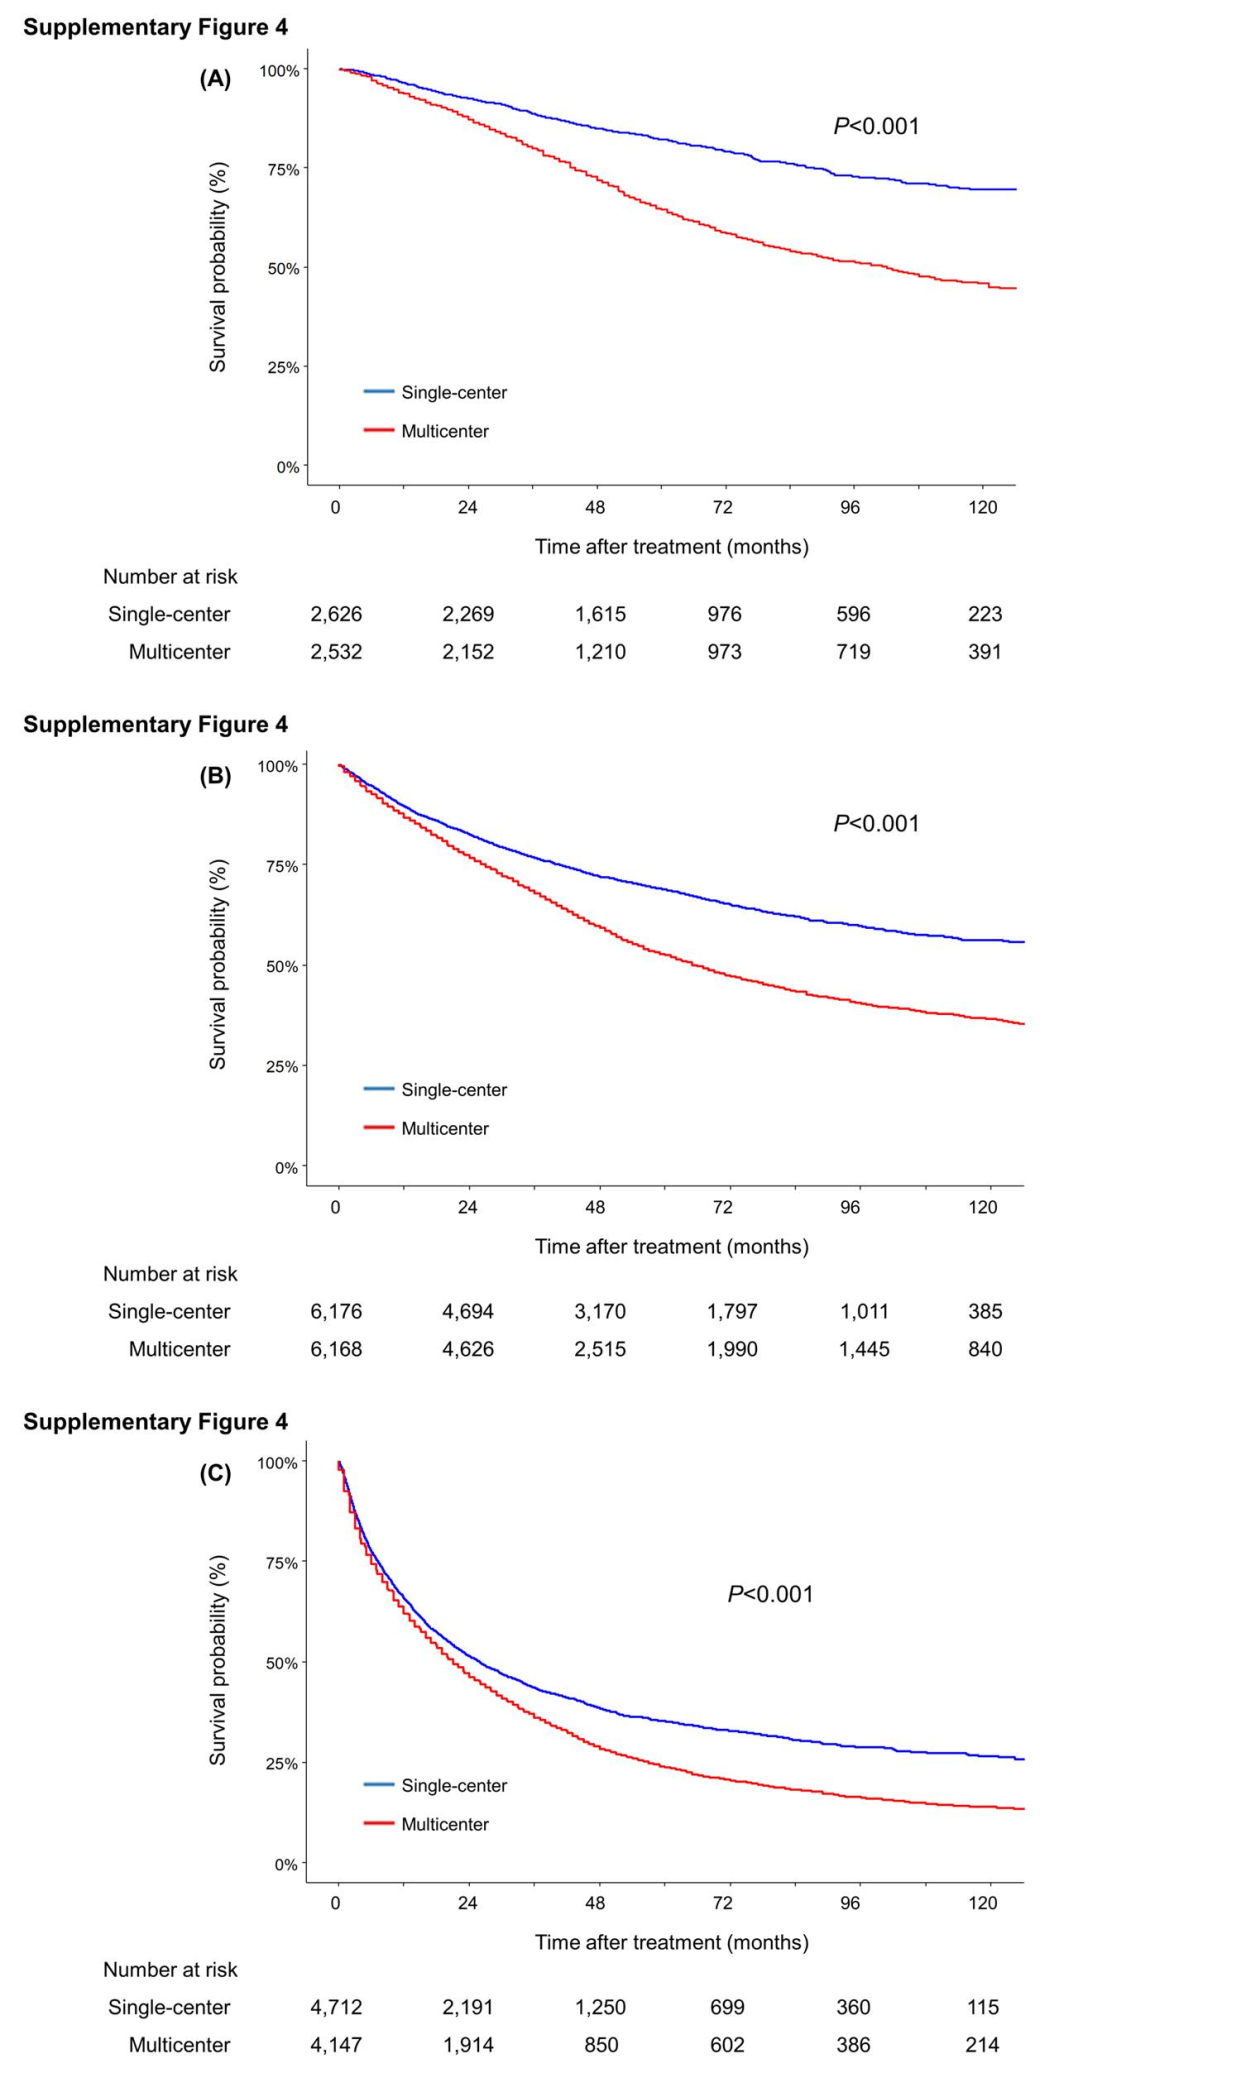
**

**
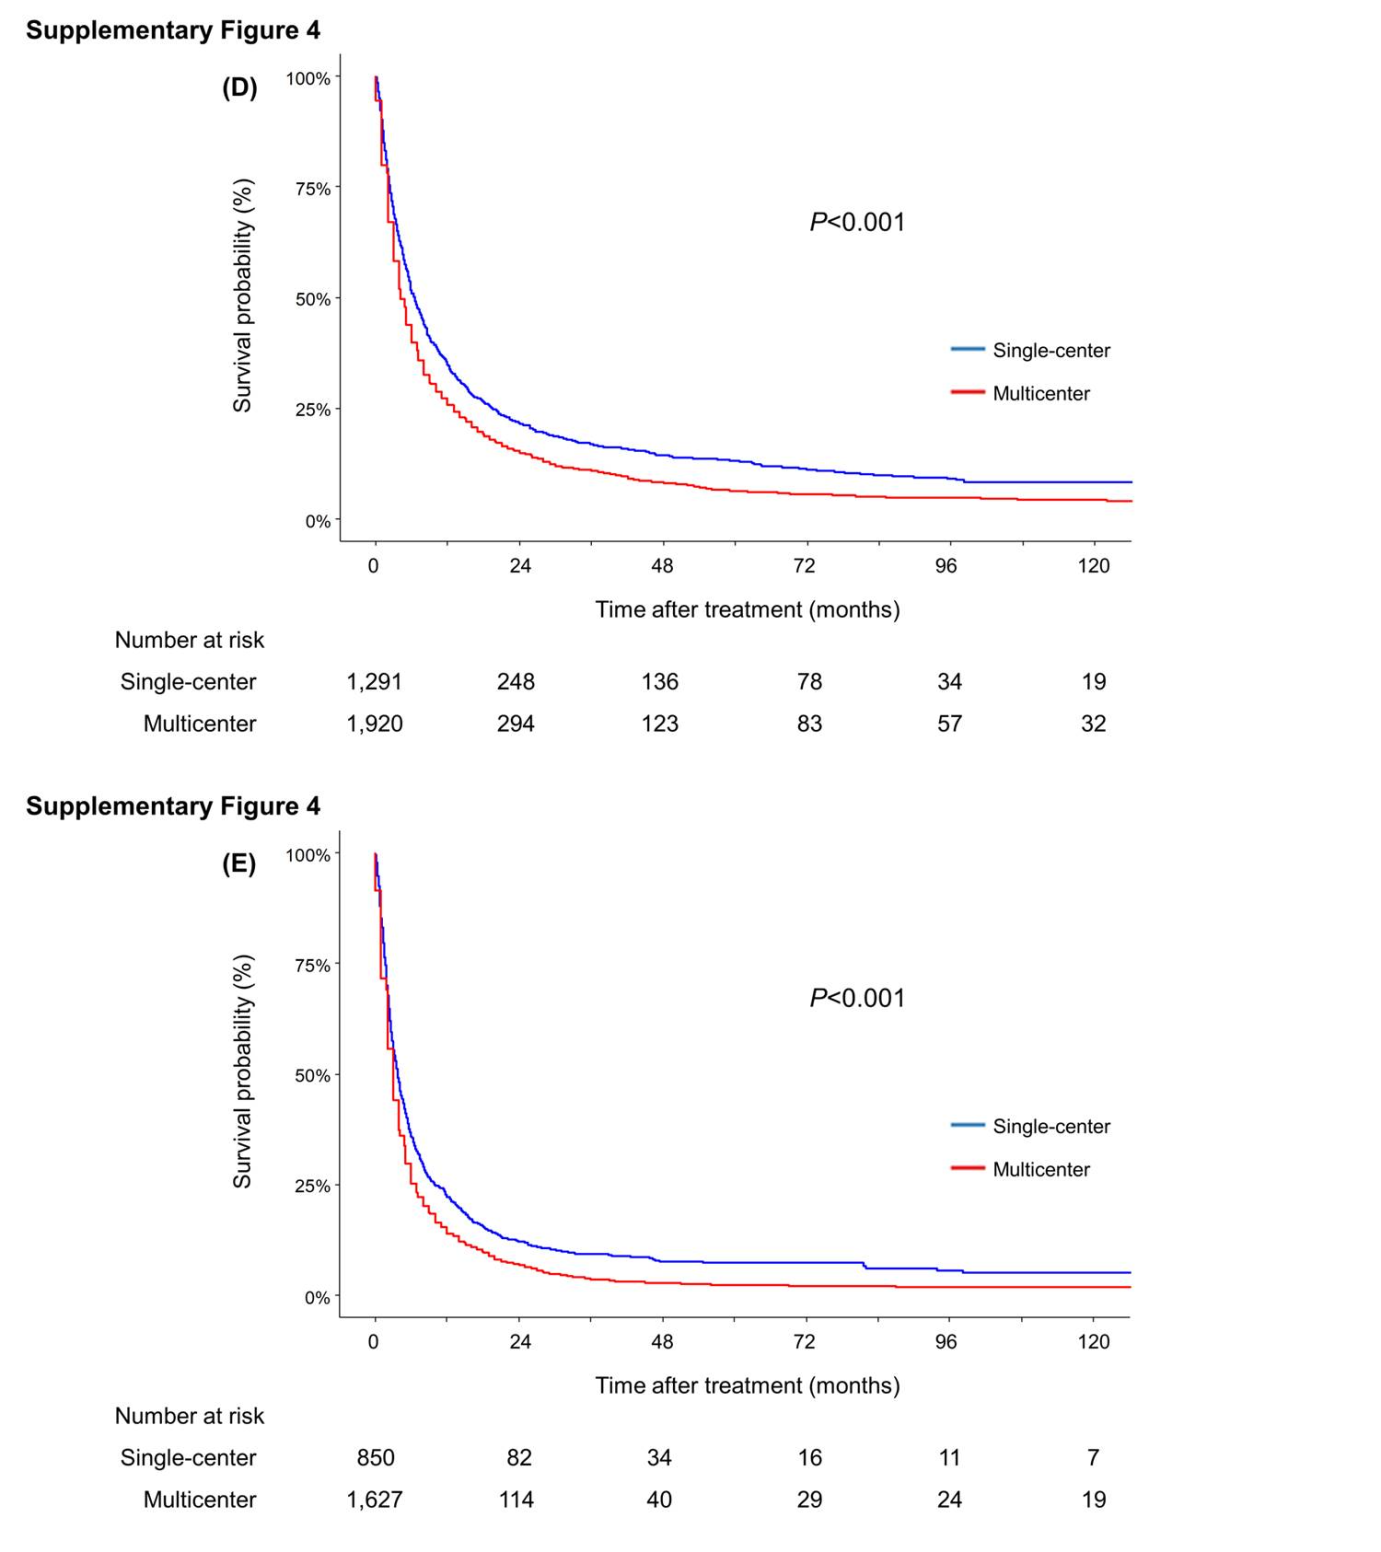

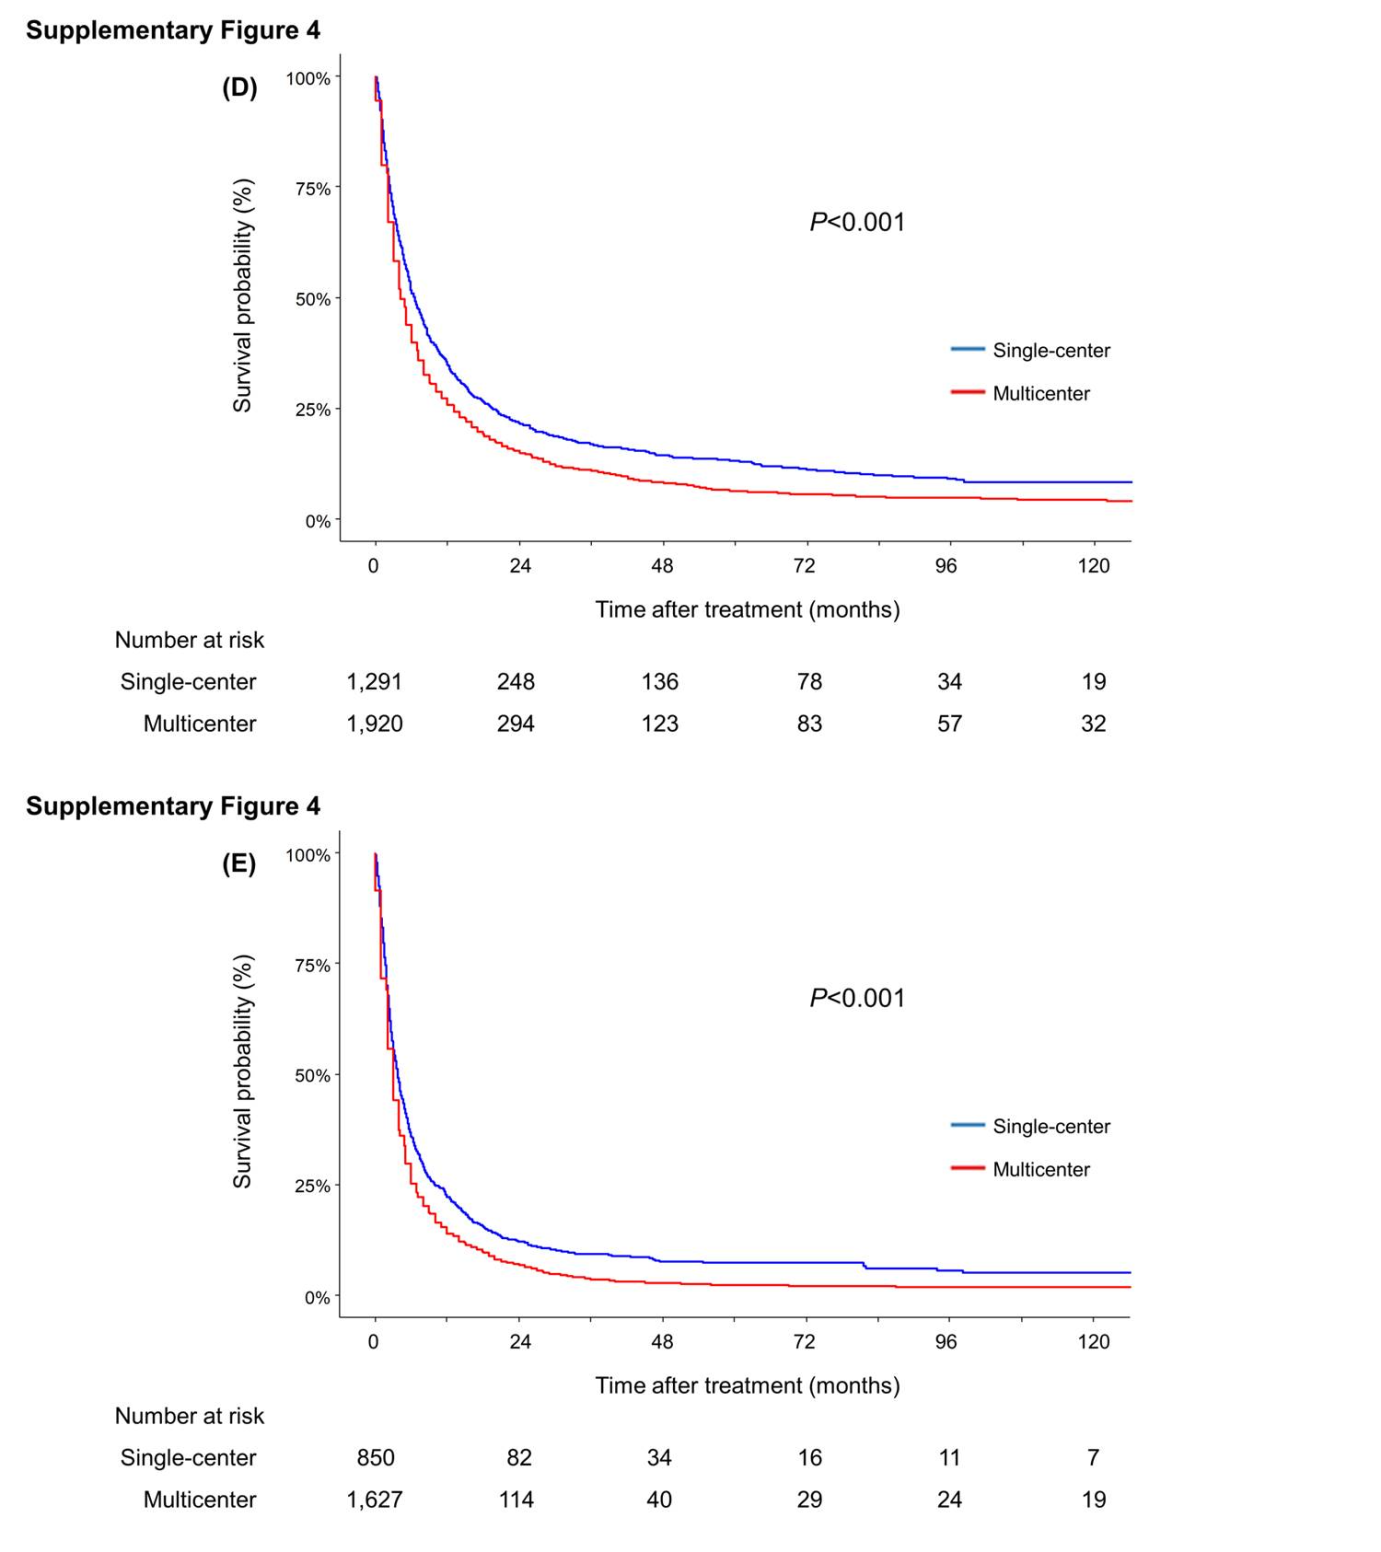
**

**SUPPLEMENTARY FIGURE 5.** Kaplan–Meier estimates of overall survival of patients who received (A) surgical resection, (B) liver transplants, (C) LAT, (D) TACE, (E) systemic therapy, and (F) radiotherapy

Abbreviations: LAT, local ablation therapy; TACE, transarterial chemoembolization; TARE, transarterial radioembolization.


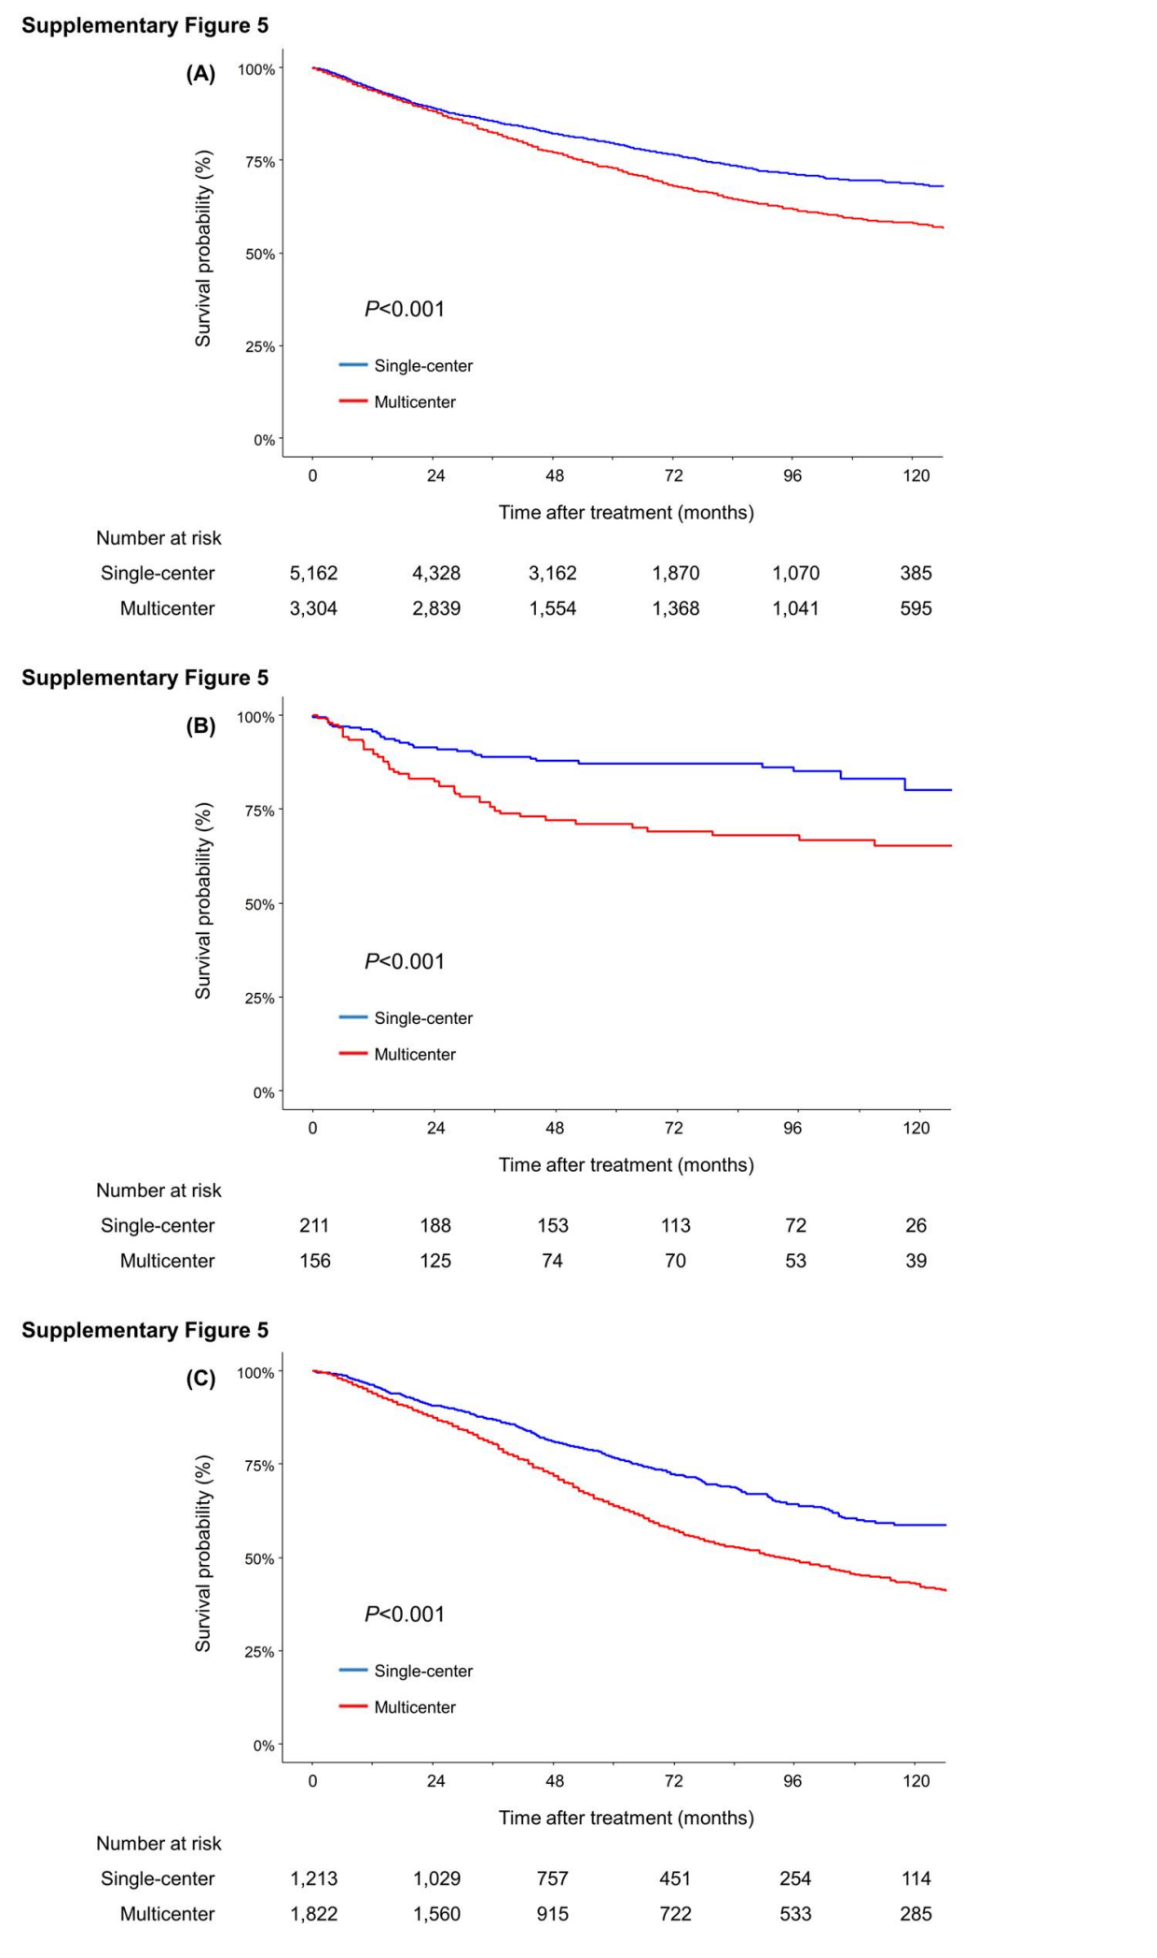

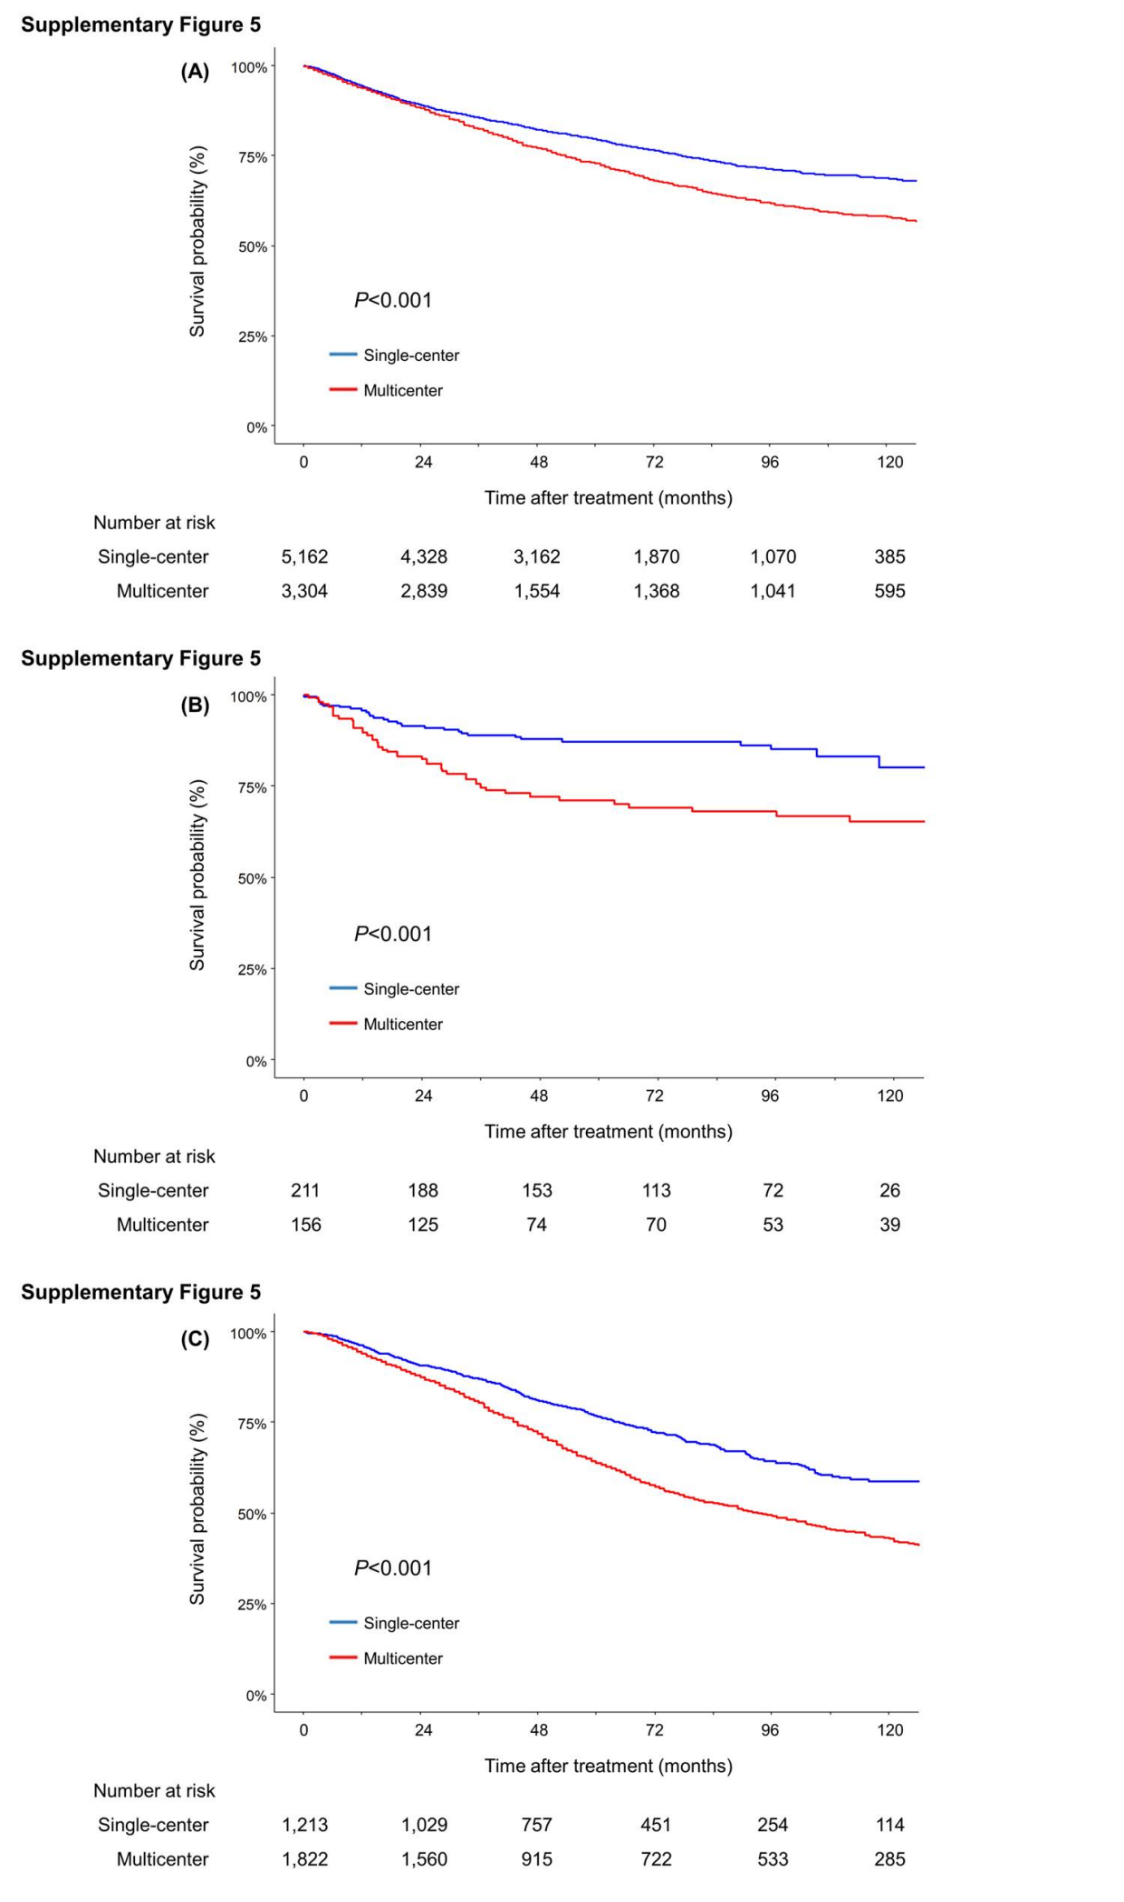

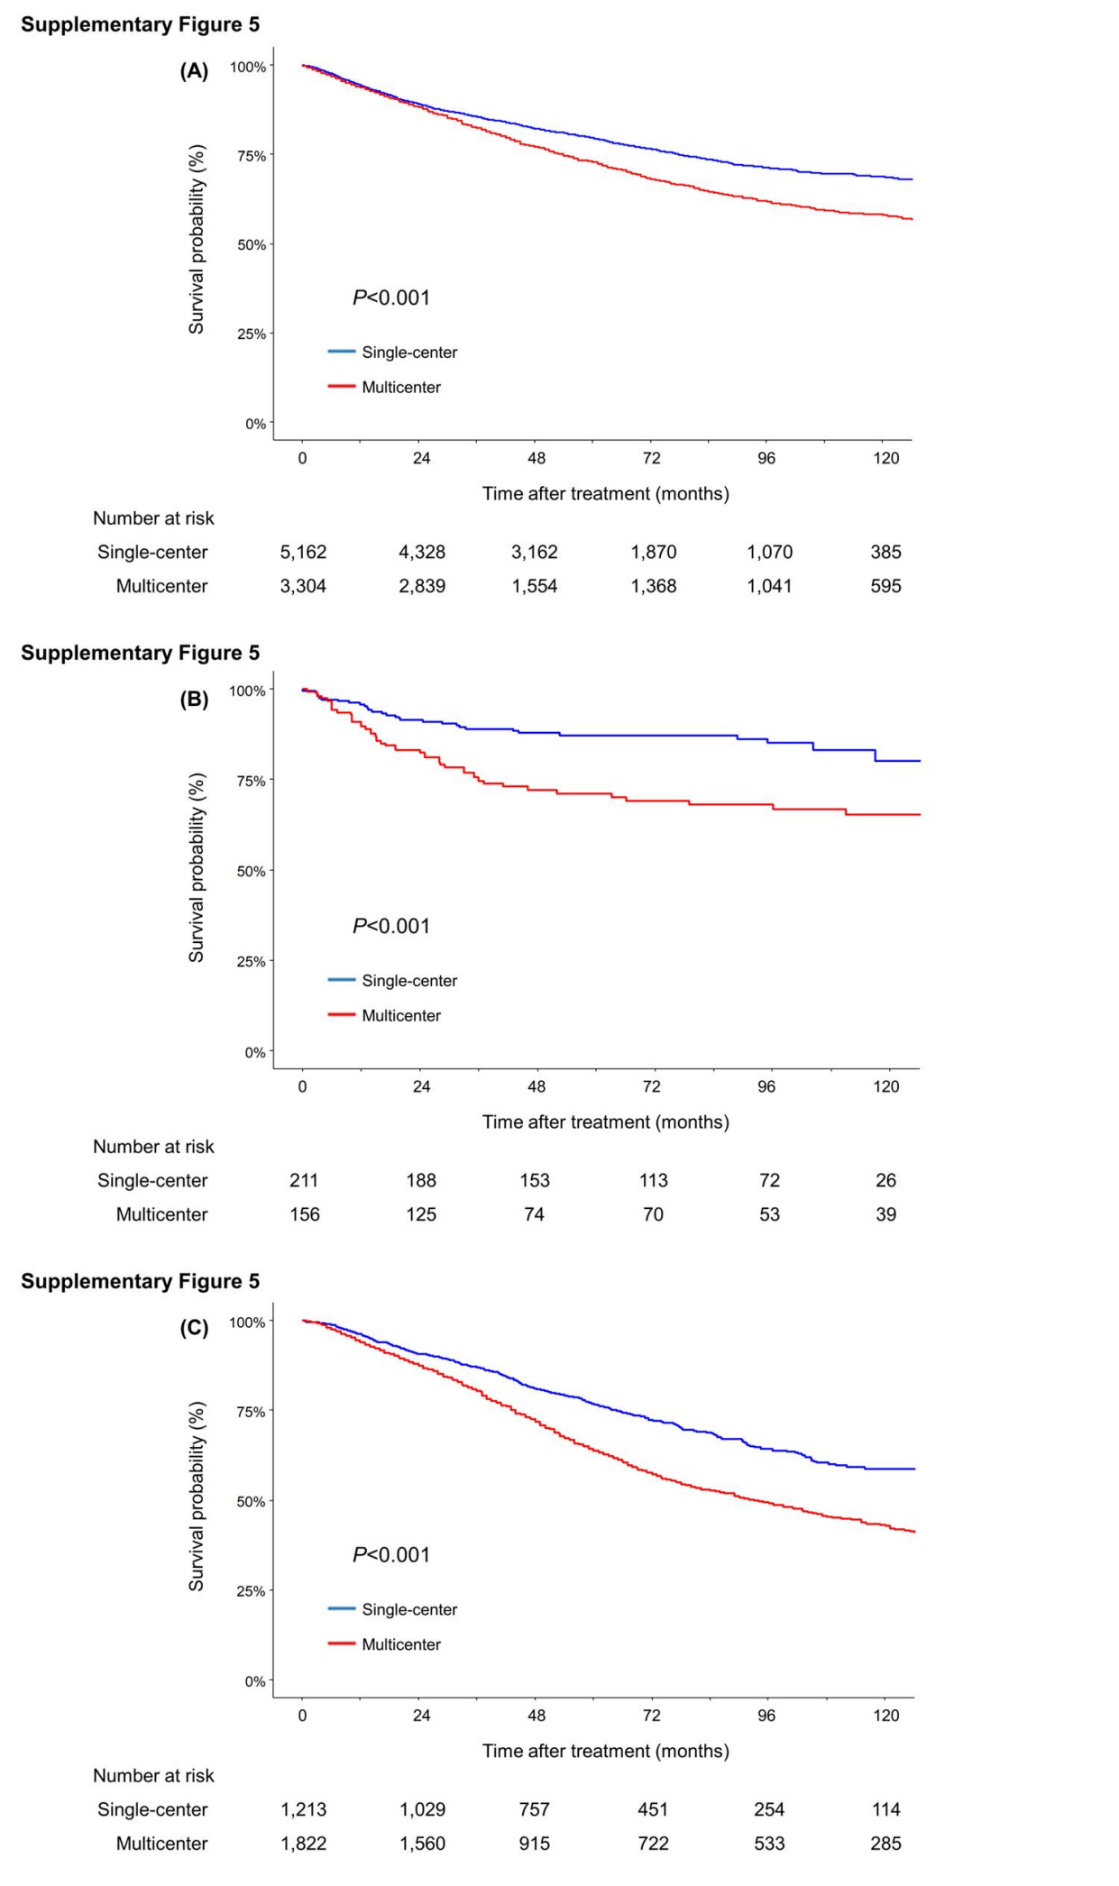

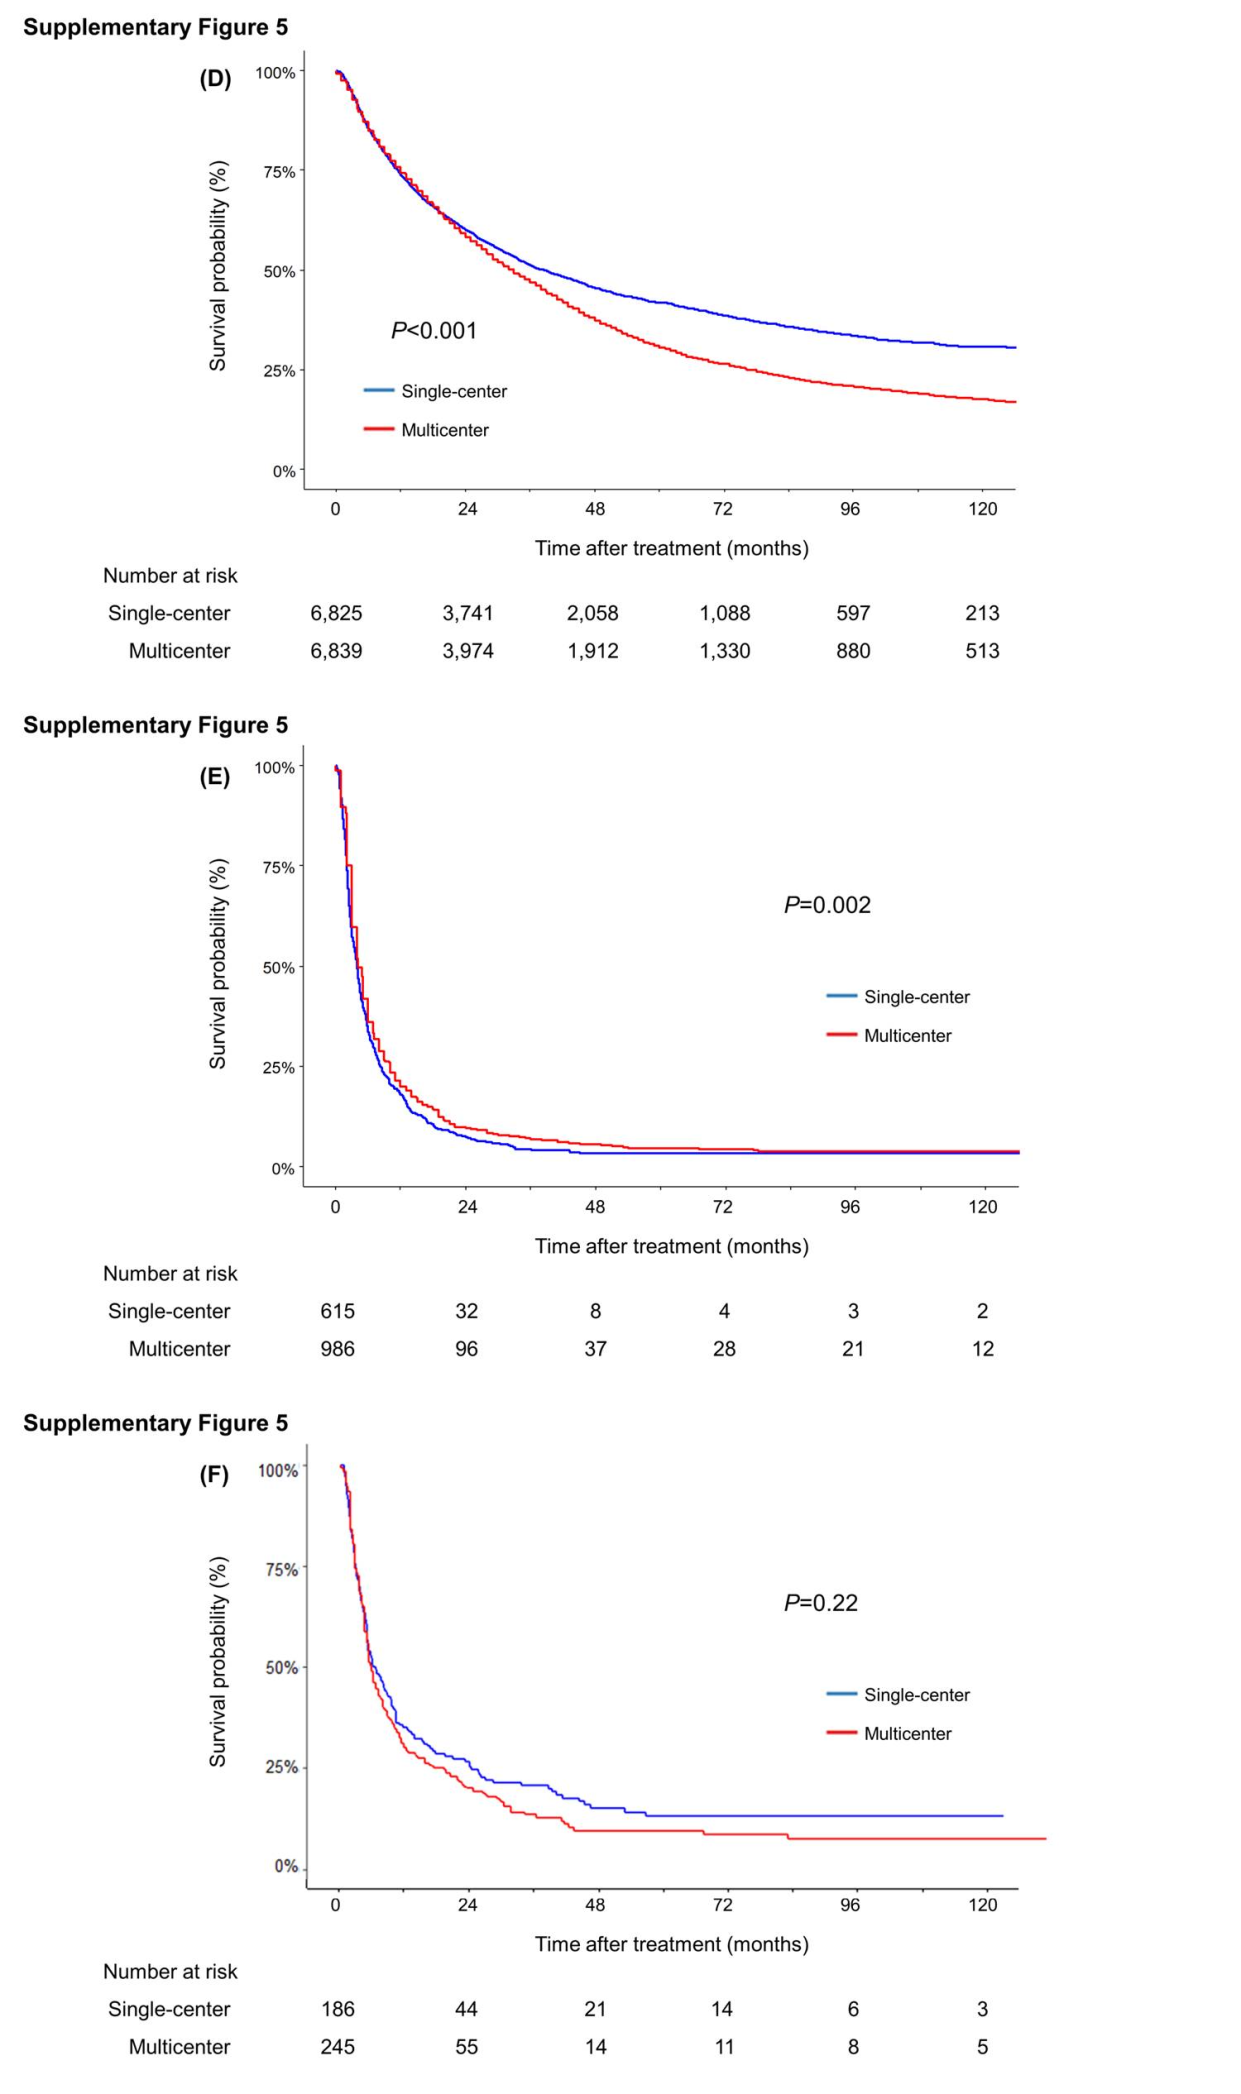

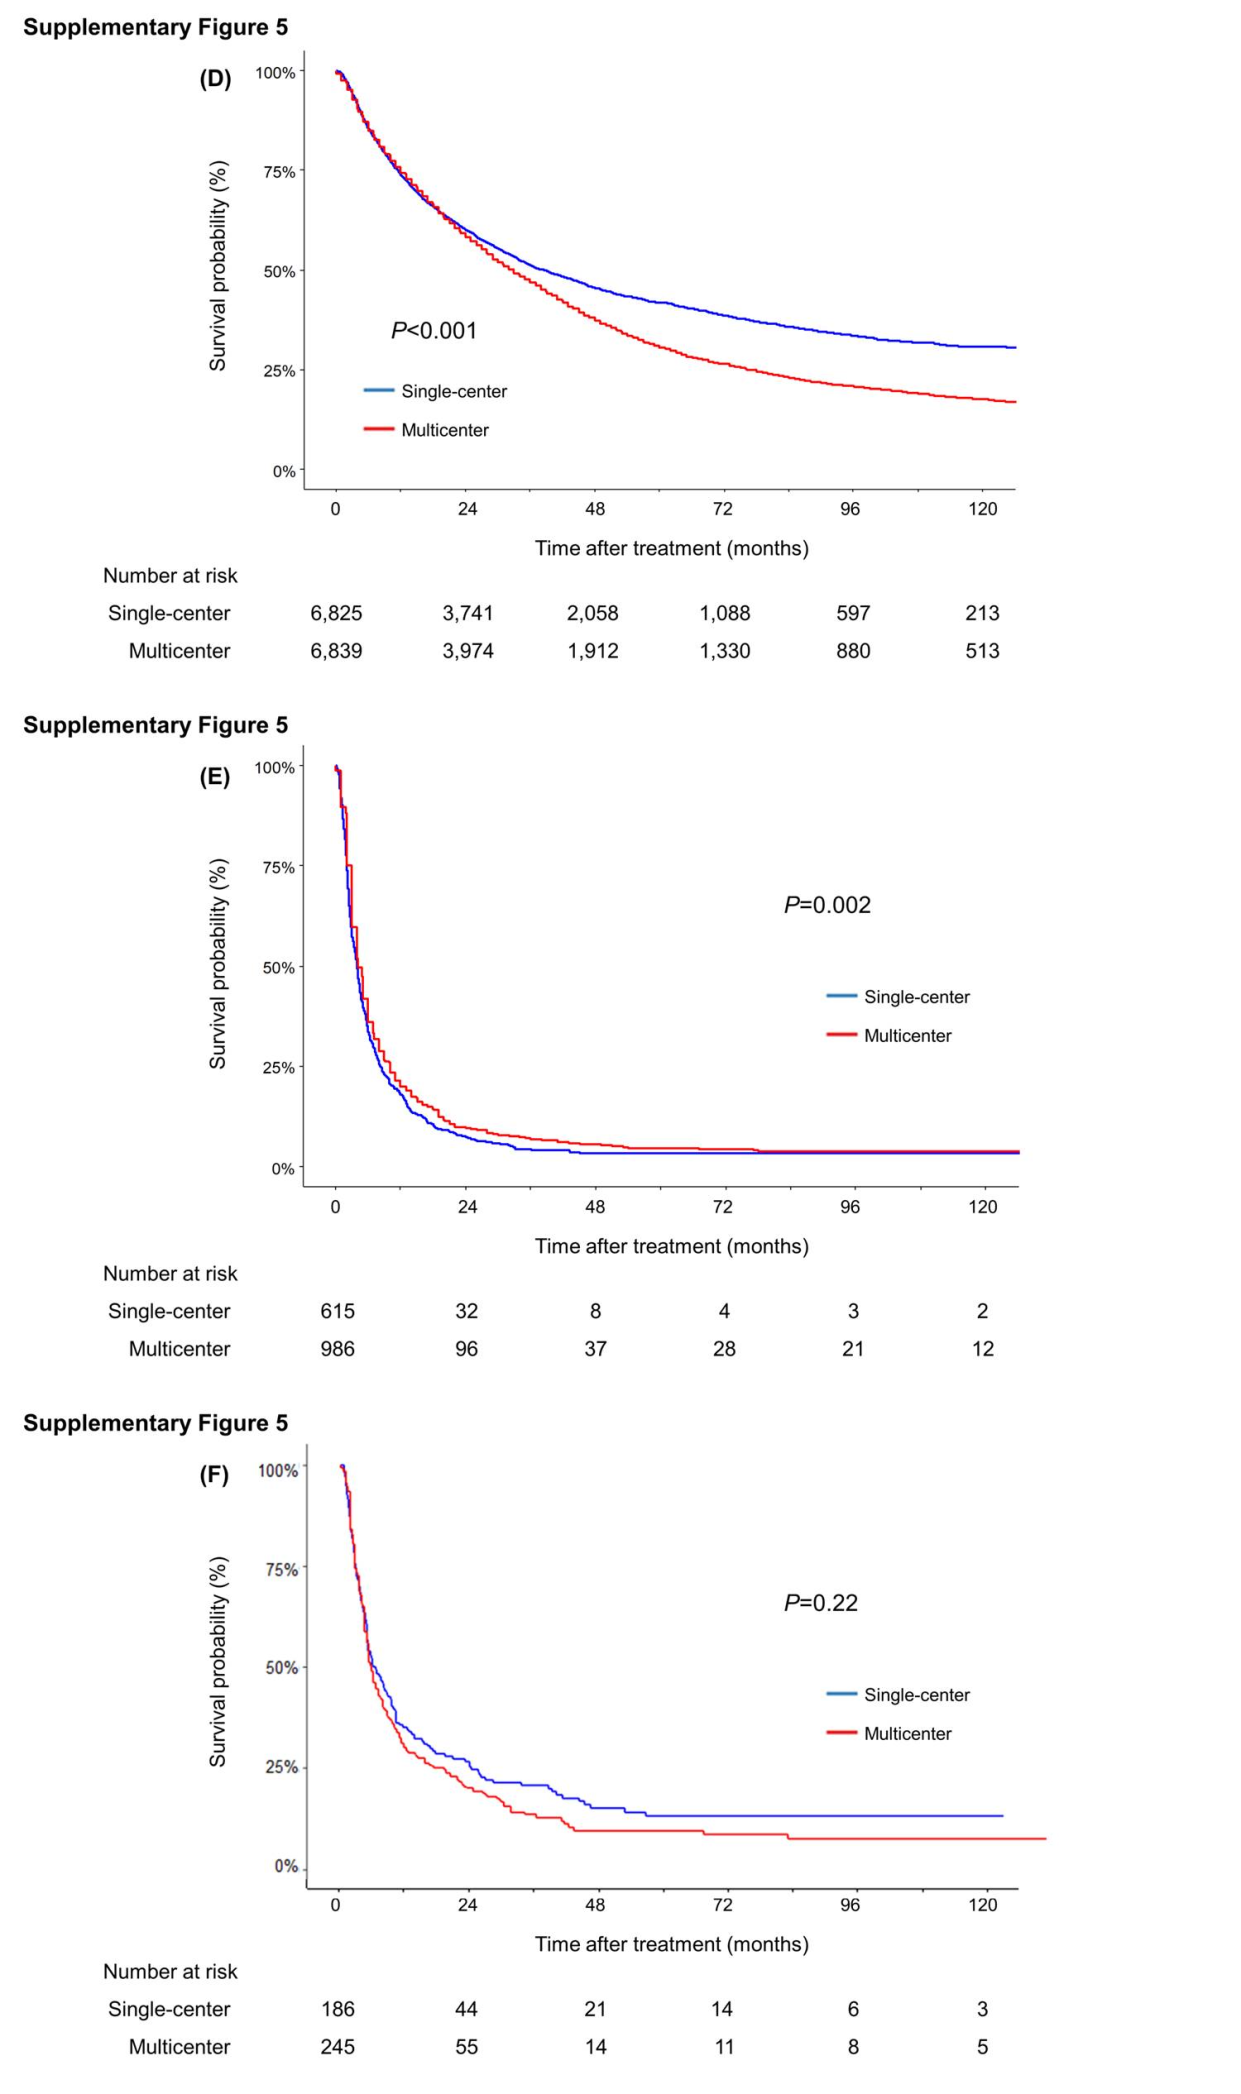


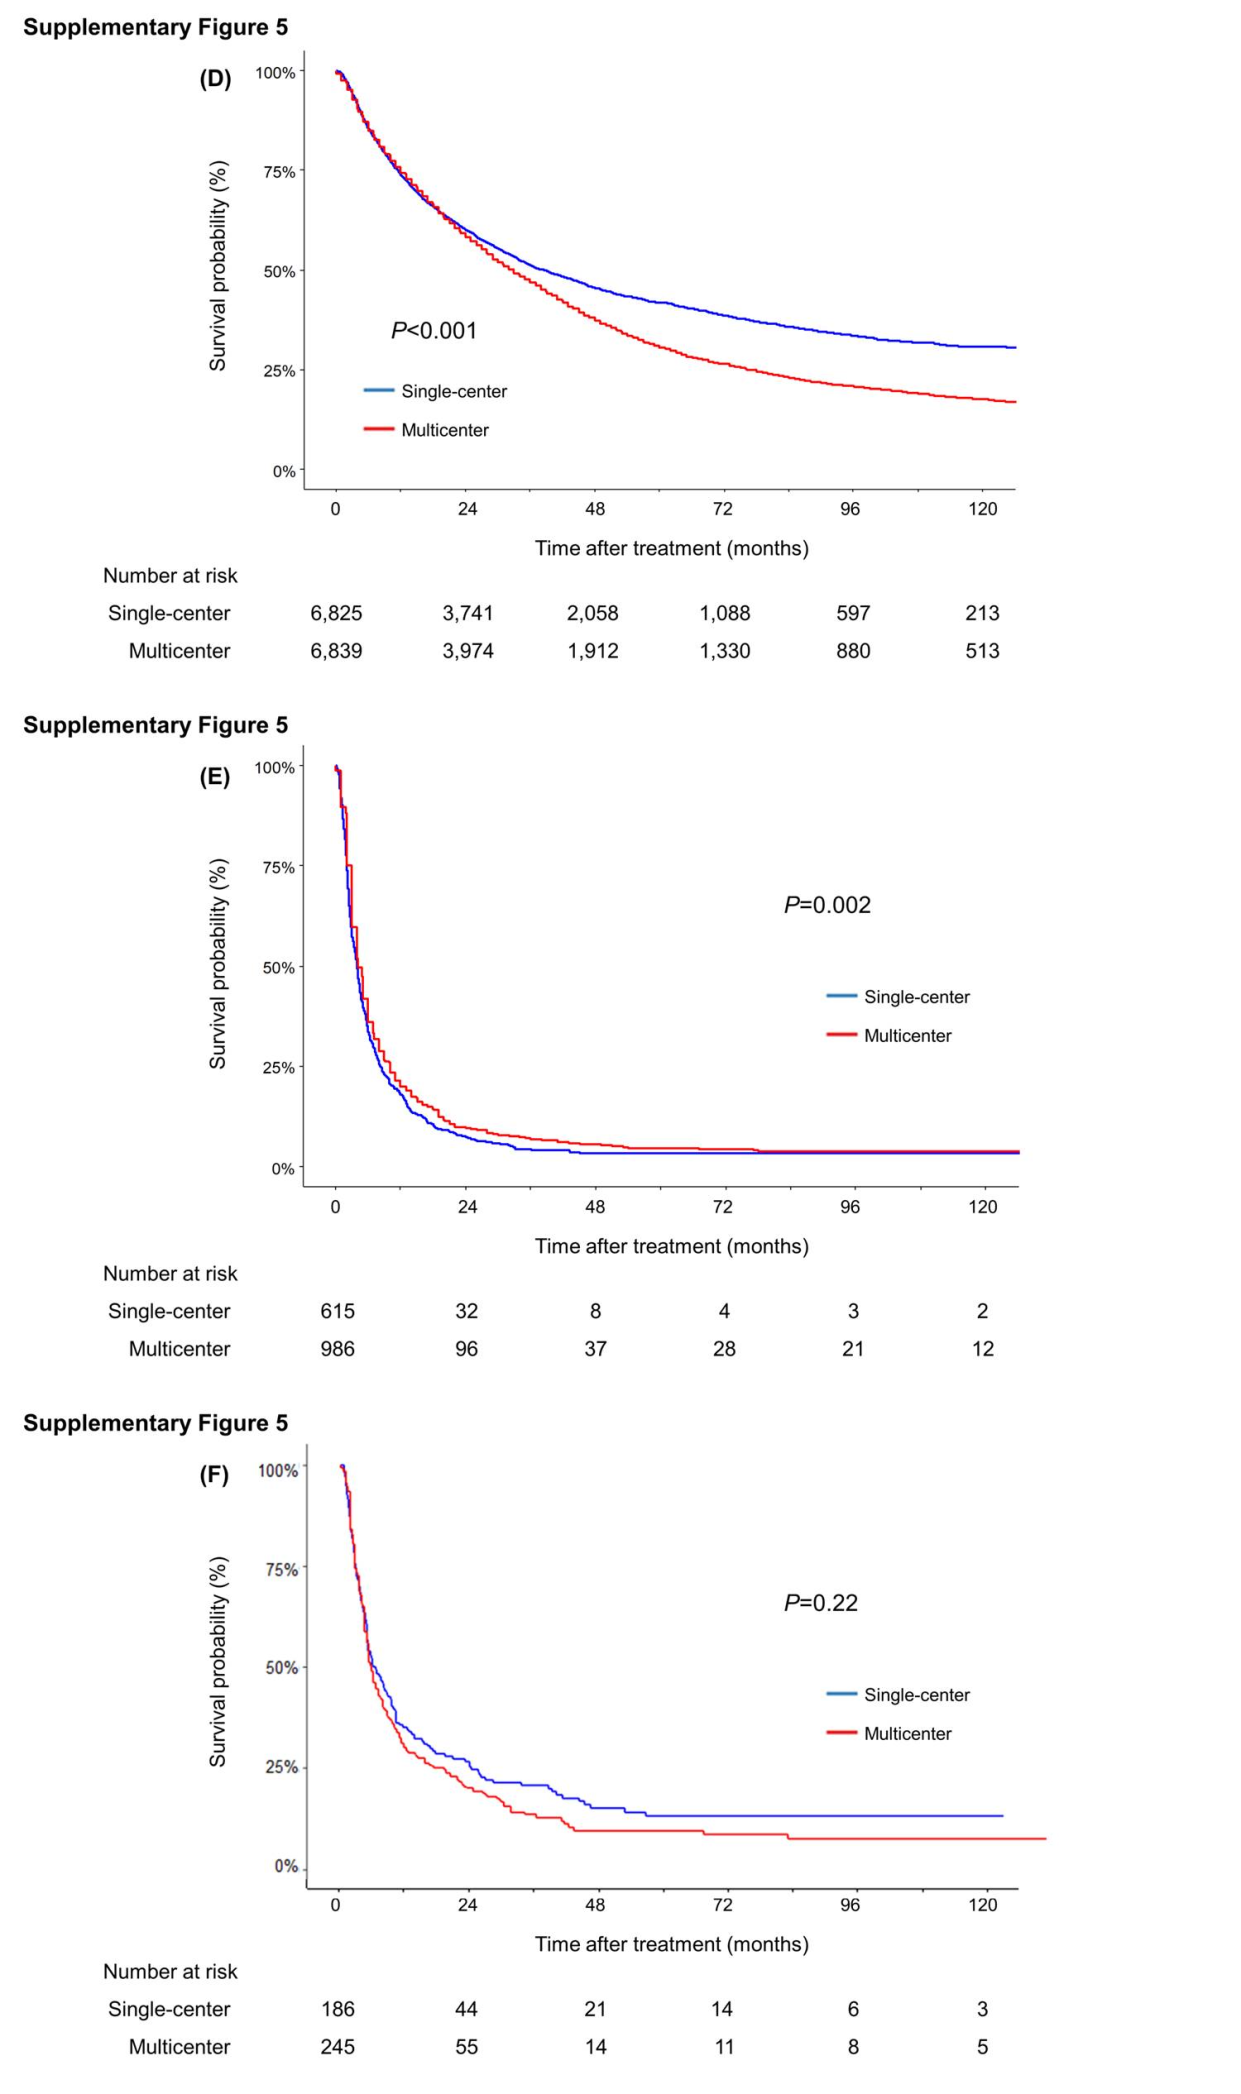


**SUPPLEMENTARY FIGURE 6.** Kaplan-Meier estimates of overall survival following (A) curative treatment, (B) non-curative treatment, (C) best supportive care

Curative treatment was defined as surgical resection, liver transplantation, and local ablation therapy.

Non-curative treatment was defined as transarterial chemoembolization/transarterial radioembolization, radiotherapy, and systemic therapy.


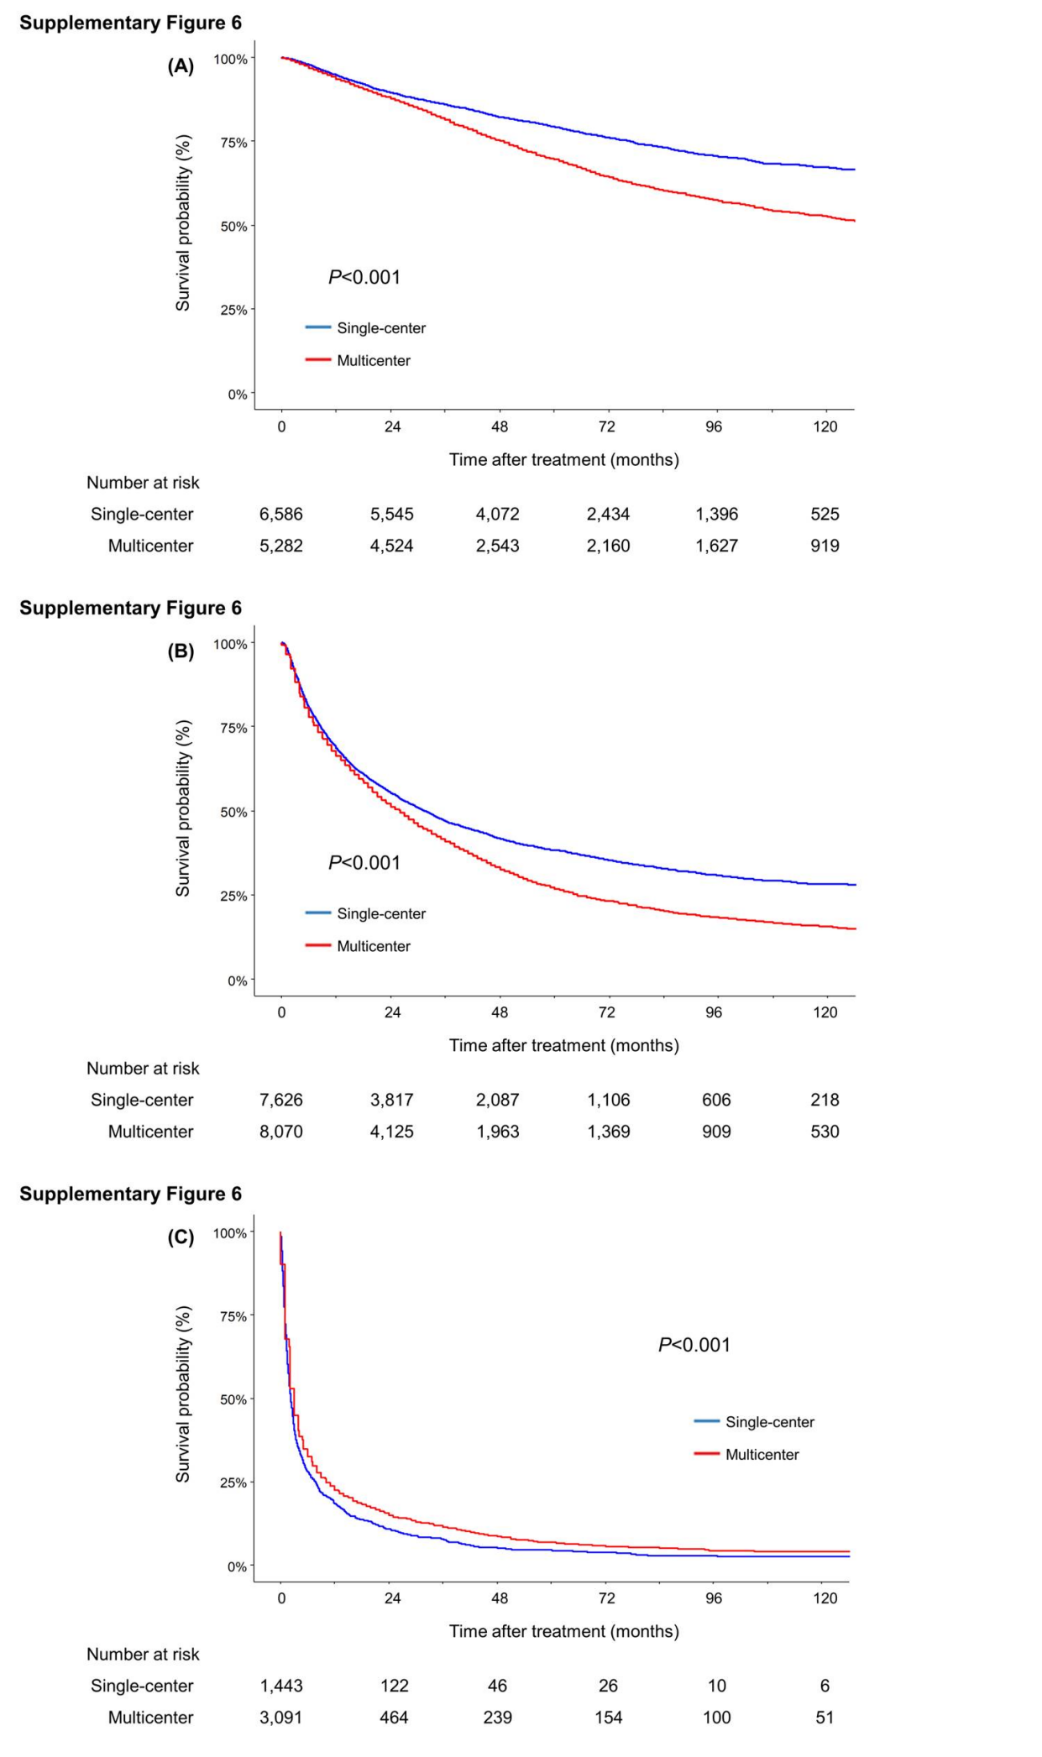

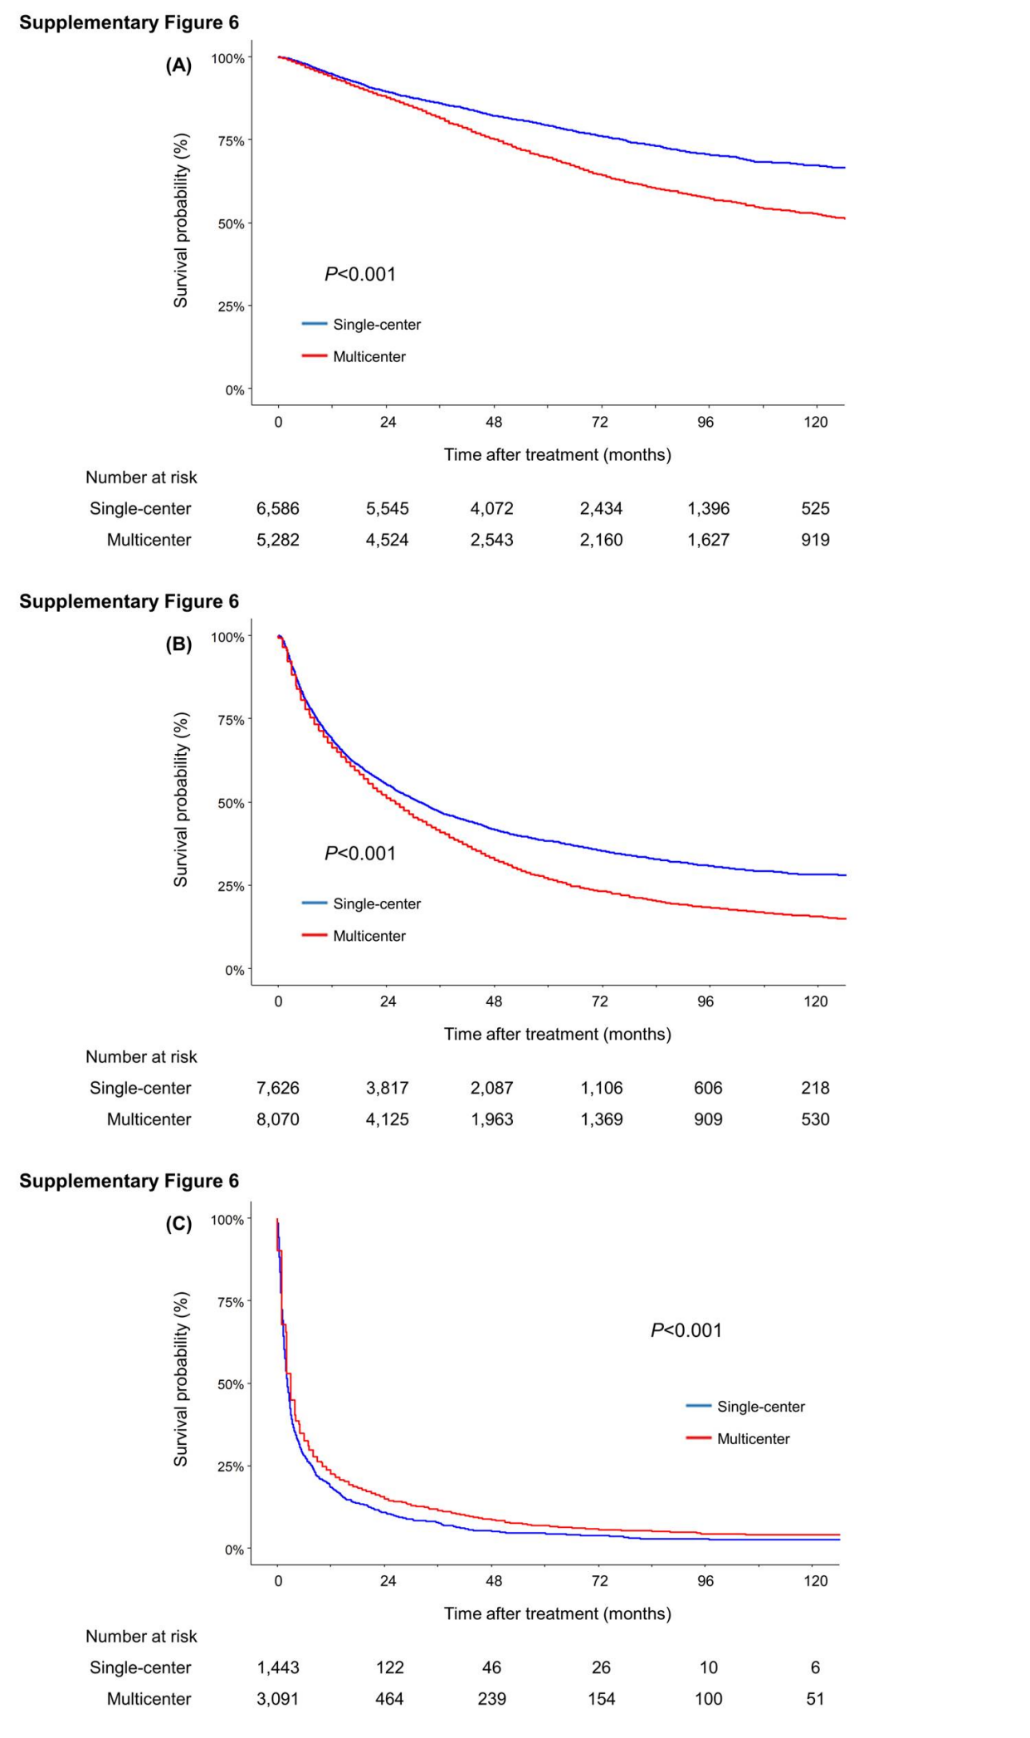


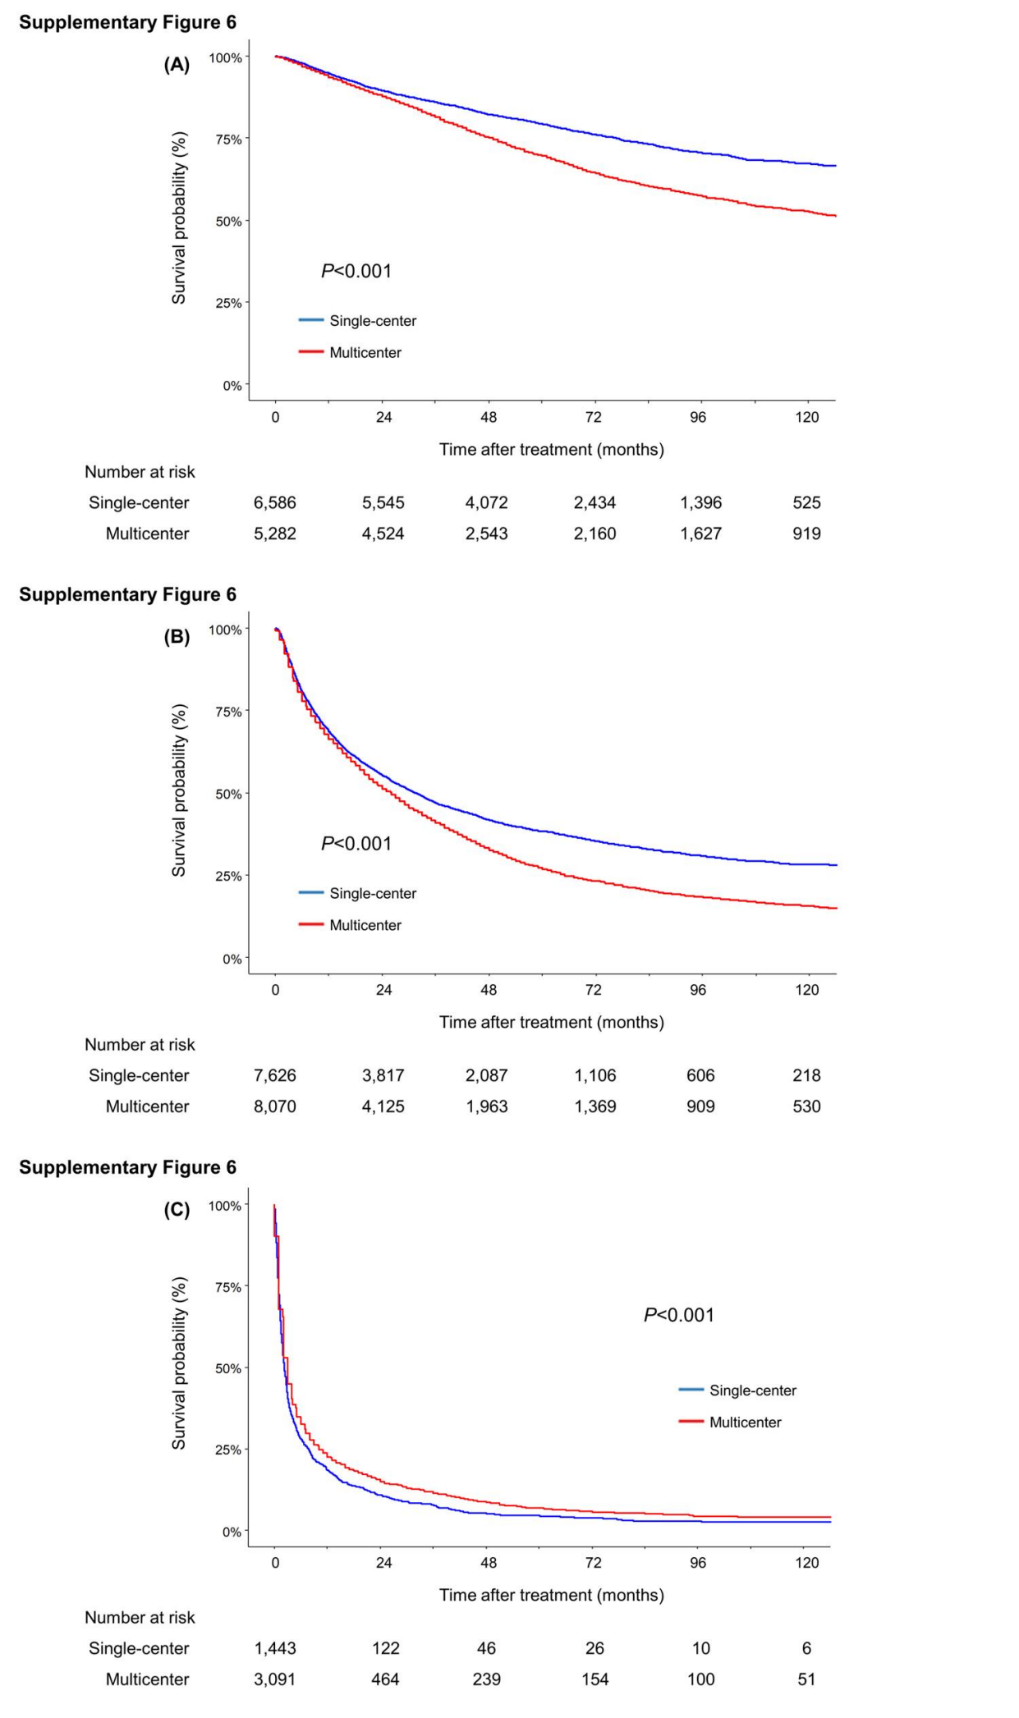


**References**

1. Dechartres A, Boutron I, Trinquart L, Charles P, Ravaud P. Single-center trials show larger treatment effects than multicenter trials: evidence from a meta-epidemiologic study. *Annals of internal medicine.* 2011;155(1):39-51.

2. Bafeta A, Dechartres A, Trinquart L, Yavchitz A, Boutron I, Ravaud P. Impact of single centre status on estimates of intervention effects in trials with continuous outcomes: meta-epidemiological study. *Bmj.* 2012;344.

3. Unverzagt S, Prondzinsky R, Peinemann F. Single-center trials tend to provide larger treatment effects than multicenter trials: a systematic review. *Journal of clinical epidemiology.* 2013;66(11):1271-1280.

4. Samaga D, Hornung R, Braselmann H, et al. Single-center versus multi-center data sets for molecular prognostic modeling: a simulation study. *Radiation Oncology.* 2020;15:1-14.

5. McCarthy JF, McCarthy PM, Massad MG, et al. Risk factors for death after heart transplantation: does a single-center experience correlate with multicenter registries? *The Annals of thoracic surgery.* 1998;65(6):1574-1578.

6. Senn SJ, Lewis RJ. Treatment effects in multicenter randomized clinical trials. *Jama.* 2019;321(12):1211-1212.

7. Park JW, Chen M, Colombo M, et al. Global patterns of hepatocellular carcinoma management from diagnosis to death: the BRIDGE Study. *Liver International.* 2015;35(9):2155-2166.

8. Laube R, Sabih AH, Strasser SI, Lim L, Cigolini M, Liu K. Palliative care in hepatocellular carcinoma. *Journal of Gastroenterology and Hepatology.* 2021;36(3):618-628.

9. Woodrell CD, Hansen L, Schiano TD, Goldstein NE. Palliative care for people with hepatocellular carcinoma, and specific benefits for older adults. *Clinical therapeutics.* 2018;40(4):512-525.

10. Do You D, Kim DG, Seo CH, Choi HJ, Yoo YK, Park YG. Prognostic factors after curative resection hepatocellular carcinoma and the surgeon's role. *Annals of Surgical Treatment and Research.* 2017;93(5):252.

11. Berger NG, Silva JP, Mogal H, et al. Overall survival after resection of retroperitoneal sarcoma at academic cancer centers versus community cancer centers: an analysis of the National Cancer Data Base. *Surgery.* 2018;163(2):318-323.

12. Meyerhardt JA, Tepper JE, Niedzwiecki D, et al. Impact of hospital procedure volume on surgical operation and long-term outcomes in high-risk curatively resected rectal cancer: findings from the Intergroup 0114 Study. *Journal of clinical oncology.* 2004;22(1):166-174.

13. Kozower BD, Stukenborg GJ. Hospital esophageal cancer resection volume does not predict patient mortality risk. *The Annals of thoracic surgery.* 2012;93(5):1690-1698.

14. Northup P, Pruett T, Stukenborg G, Berg C. Survival after adult liver transplantation does not correlate with transplant center case volume in the MELD era. *American journal of transplantation.* 2006;6(10):2455-2462.

15. Lee T-Y, Lin J-T, Ho HJ, Wu M-S, Wu C-Y. Evaluation of the effect of cumulative operator experience on hepatocellular carcinoma recurrence after primary treatment with radiofrequency ablation. *Radiology.* 2015;276(1):294-301.

16. Poon RT, Ng KK, Lam CM, et al. Learning curve for radiofrequency ablation of liver tumors: prospective analysis of initial 100 patients in a tertiary institution. *Annals of surgery.* 2004;239(4):441-449.

17. Raoul J-L, Sangro B, Forner A, et al. Evolving strategies for the management of intermediate-stage hepatocellular carcinoma: available evidence and expert opinion on the use of transarterial chemoembolization. *Cancer treatment reviews.* 2011;37(3):212-220.

18. Biau DJ, Halm JA, Ahmadieh H, et al. Provider and center effect in multicenter randomized controlled trials of surgical specialties: an analysis on patient-level data. *Annals of surgery.* 2008;247(5):892-898.

19. Boutron I, Tubach F, Giraudeau B, Ravaud P. Methodological differences in clinical trials evaluating nonpharmacological and pharmacological treatments of hip and knee osteoarthritis. *Jama.* 2003;290(8):1062-1070.

20. Jo D. The interpretation bias and trap of multicenter clinical research. *The Korean Journal of Pain.* 2020;33(3):199.

21. Llovet JM, Ricci S, Mazzaferro V, et al. Sorafenib in advanced hepatocellular carcinoma. *New England journal of medicine.* 2008;359(4):378-390.
